# Supplementary material for: Molecular Docking, Computational, and Antithrombotic Studies of Novel 1,3,4-Oxadiazole Derivatives
Source: PubMed Central journal article supplement (PMC6274789; doi:10.3390/ijms19113606), 2018-11-15
Supplement: ijms-19-03606-s001.pdf [file ijms-19-03606-s001.pdf]

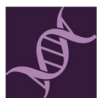

# Molecular Docking, Computational, and Antithrombotic Studies of Novel 1,3,4-Oxadiazole Derivatives

Majda Batool <sup>1</sup>, Affifa Tajammal <sup>1</sup>, Firdous Farhat <sup>1</sup>, Francis Verpoort <sup>2</sup>, Zafar A.K. Khattak <sup>2</sup>, Mehr-un-Nisa <sup>1,3</sup>, Muhammad Shahid <sup>1</sup>, Hafiz Adnan Ahmad <sup>1,4</sup>, Munawar Ali Munawar <sup>1,\*</sup>, Muhammad Zia-ur-Rehman <sup>5,\*</sup> and Muhammad Asim Raza Basra <sup>1,\*</sup>

<sup>1</sup> Institute of Chemistry, University of the Punjab, New Campus, Lahore 54590, Pakistan; majdabatool12@gmail.com (M.B.); affifa.tajammal@yahoo.com (A.T.); farhatfirdous555@gmail.com (F.F.); anmehrunnisa@gmail.com (M.N.); mshahidkhan403@gmail.com (M.S.); adnan.ahmad.pu@hotmail.com (H.A.A.)

<sup>2</sup> Laboratory of Organometallics, Catalysis and Ordered Materials, State Key Laboratory of Advanced Technology for Material Synthesis and Processing, Wuhan University of Technology, Wuhan 430070, China; Francis.Verpoort@ghent.ac.kr (F.V.); zafarchem\_qau@yahoo.com (Z.A.K.K.)

<sup>3</sup> Division of Science & Technology, University of Education, Township, Lahore 54770, Pakistan

<sup>4</sup> Key Laboratory of Synthetic and Nature Functional Molecule Chemistry of Ministry of Education, Department of Chemistry & Materials Science, Northwest University, Xi'an 710127, China

<sup>5</sup> Applied Chemistry Research Centre, PCSIR Laboratories Complex, Ferozpur Road, Lahore 54600, Pakistan

\* Correspondence: munawaralimunawar@yahoo.com (M.A.M.); rehman\_pcsir@hotmail.com (M.Z.R.); asimbasra@gmail.com (M.A.R.B.); Tel.: +92-332-4392363 (M.A.M.); Tel.: +92-333-3451977 (M.Z.R.); Tel.: +92-42-9923046 Ext.836 (M.A.R.B.)

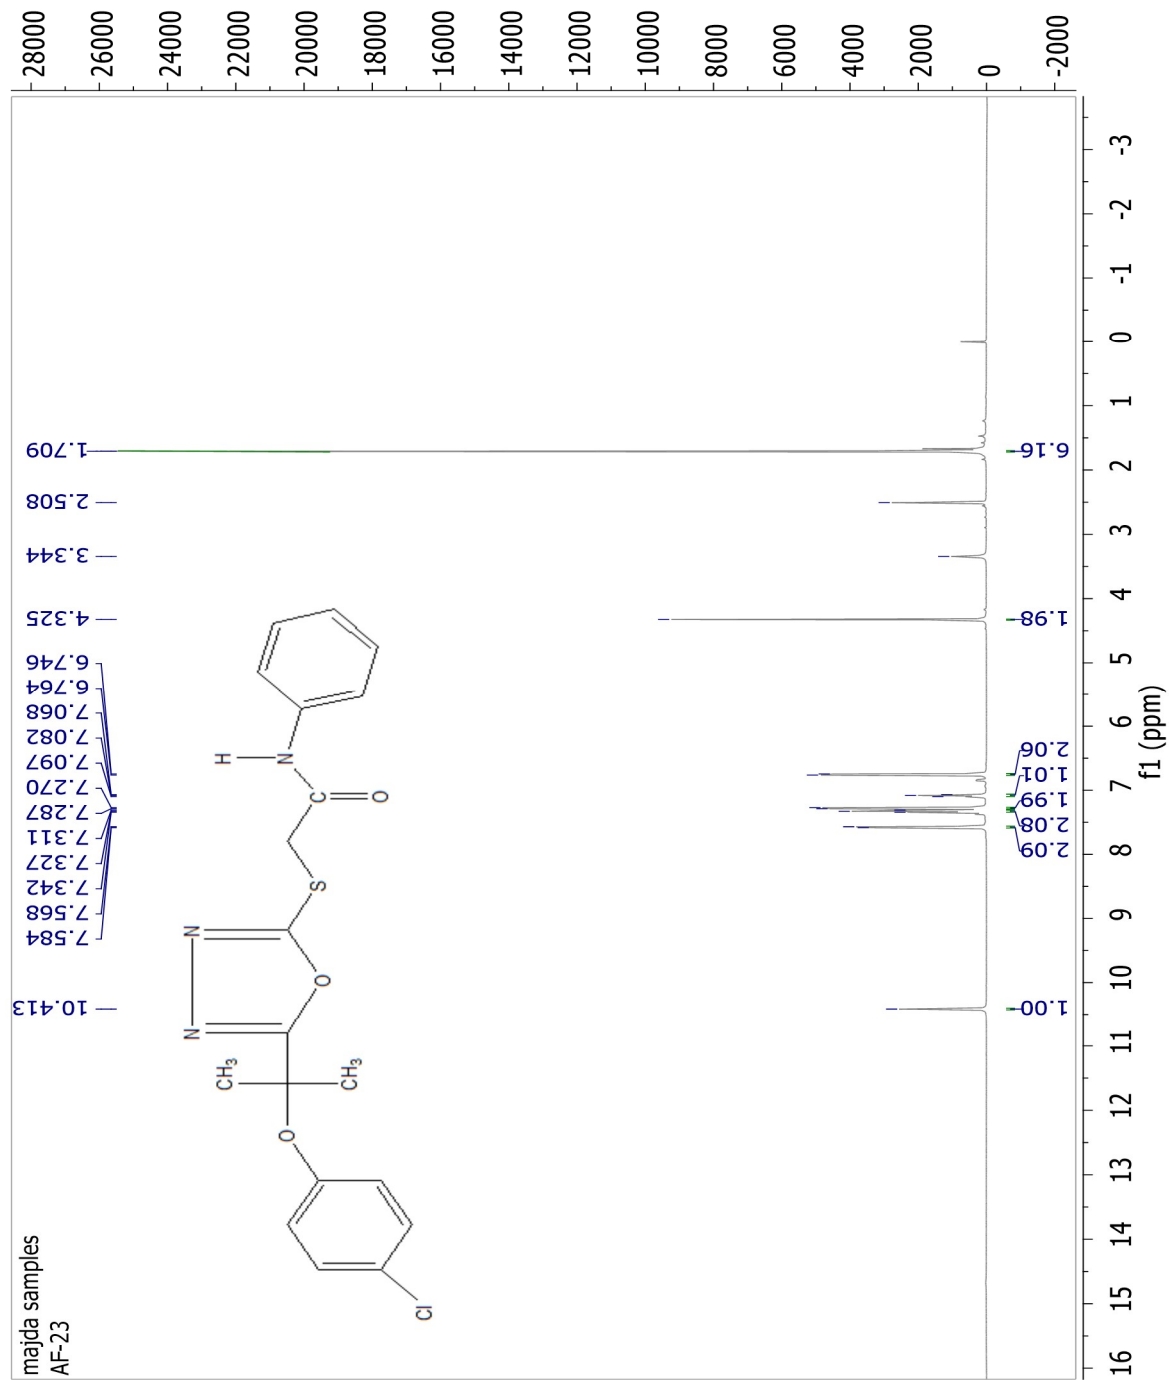

Figure S1. <sup>1</sup>H-NMR spectrum of compound 3a.

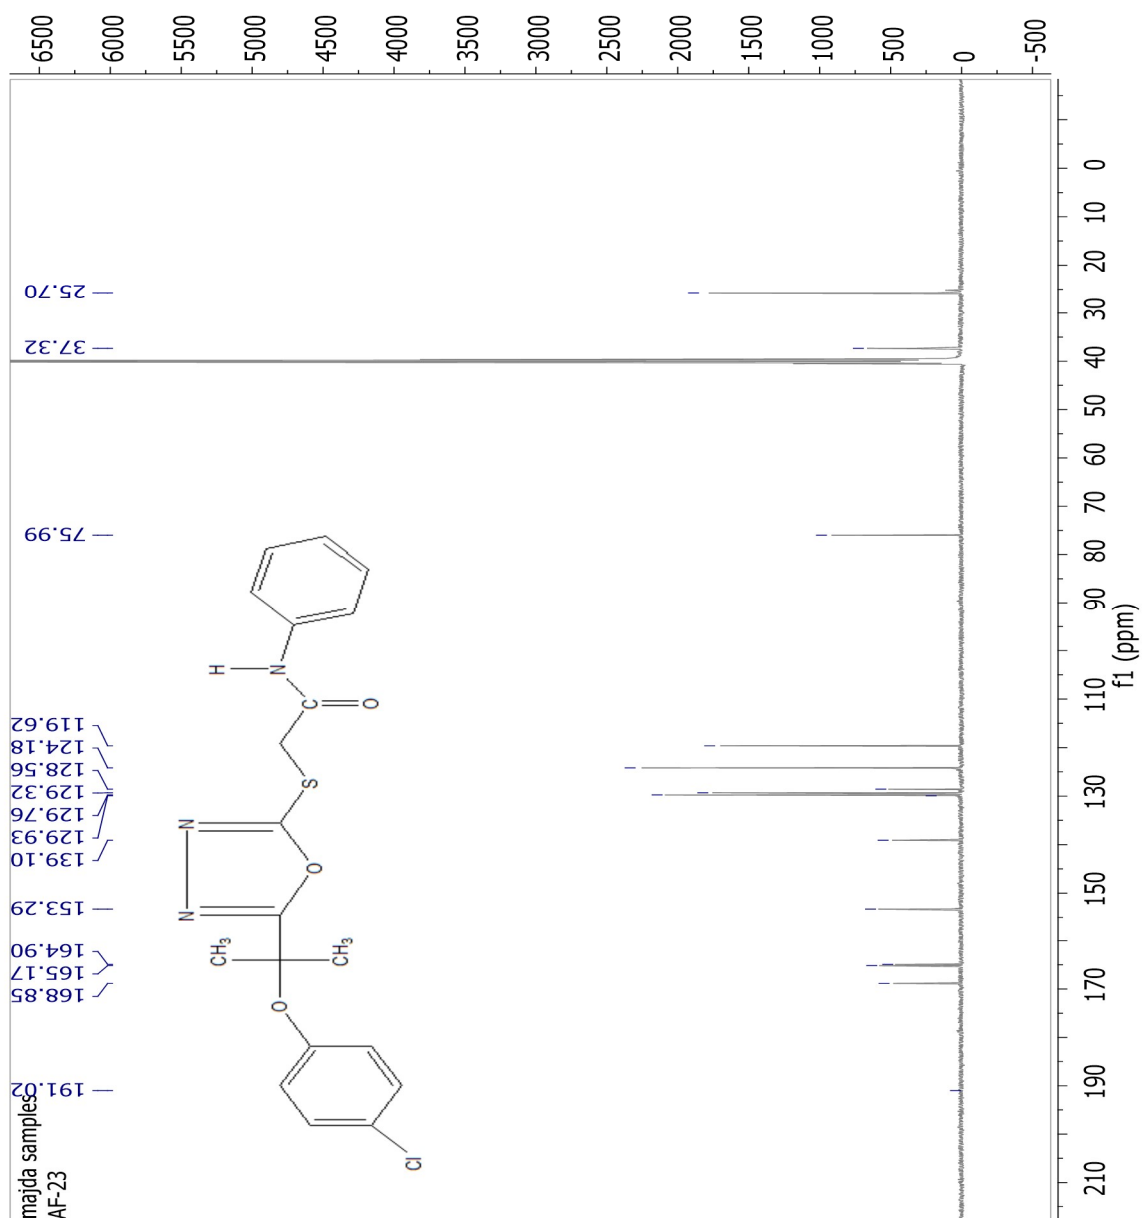Figure S2. <sup>13</sup>C-NMR spectrum of compound 3a.

**Mass Lab (104)**  
6/19/2017 1:14:38 PM

File: 28P Date Run: 06-19-2017 (Time Run: 13:10:55)  
 Sample: MMAJDA BATOOL/INST. OF CHEM /UNI.OF PUNJAB LAHORE  
 Instrument: JEOL 600 MSRoute  
 Inlet: Direct Probe  
 Ionization mode: EI+

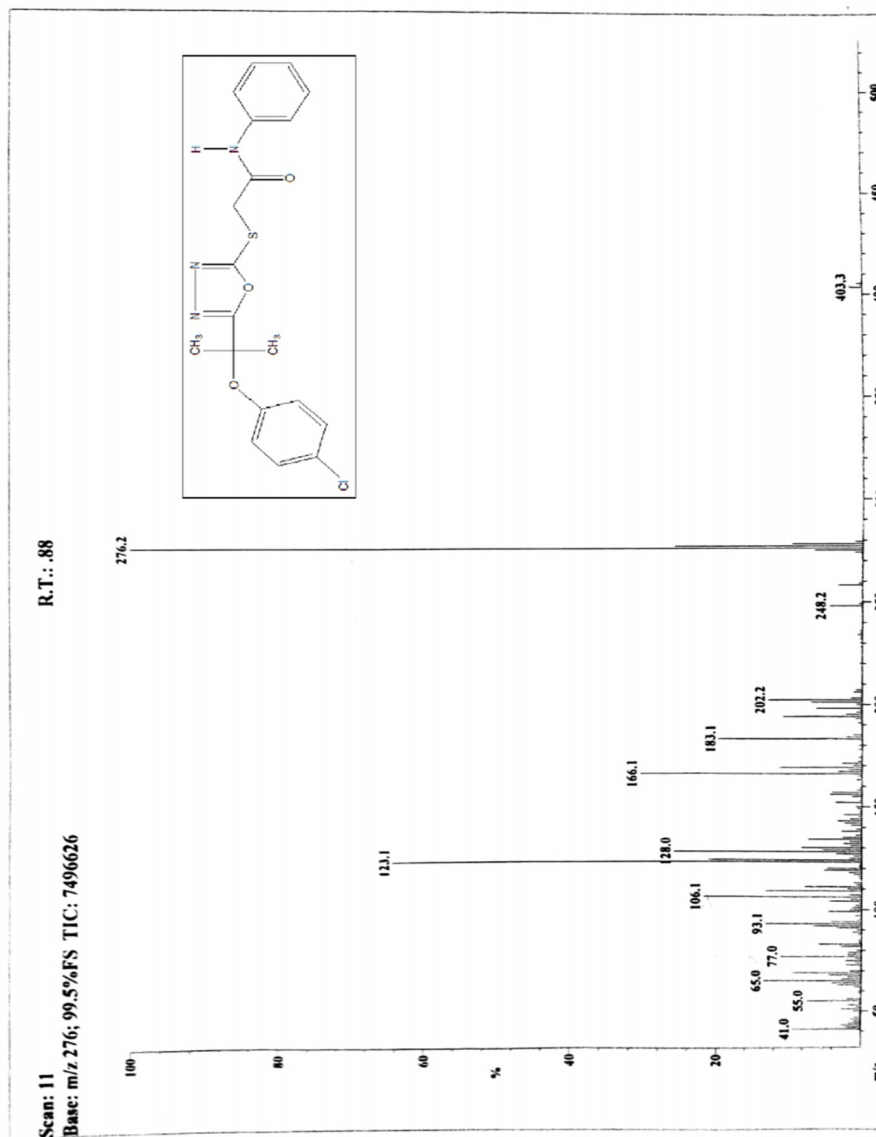

Figure S3. EI-MS of compound 3a.

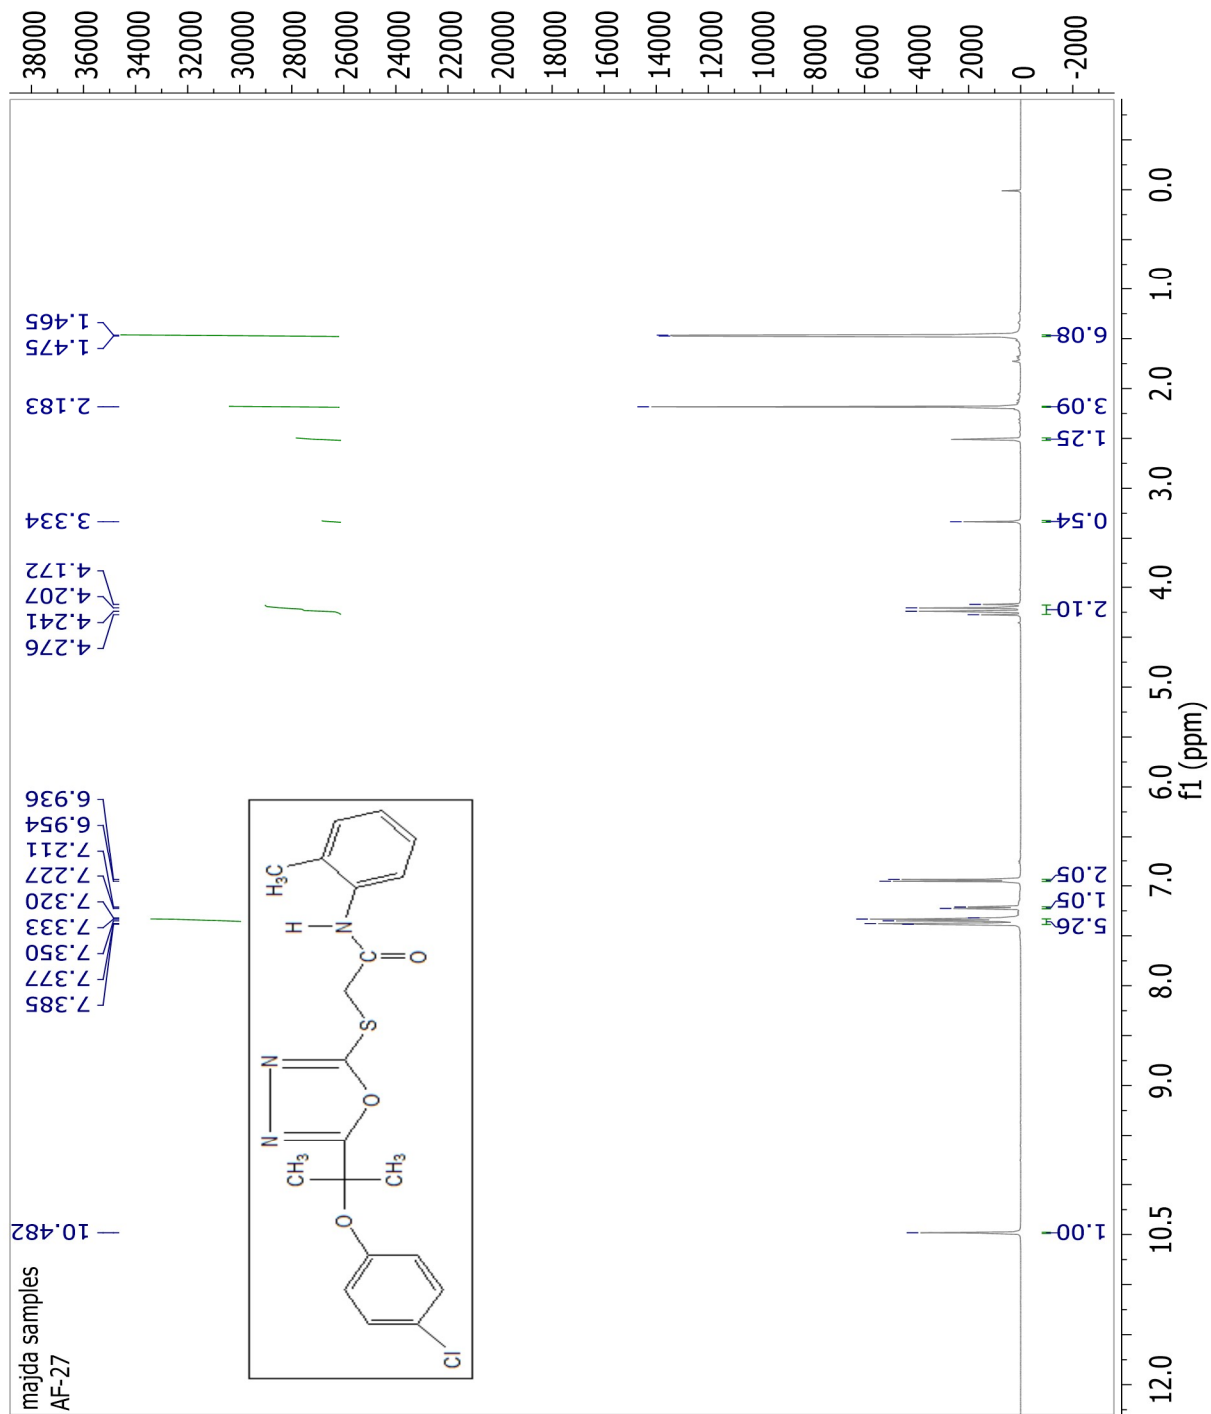

Figure S4. <sup>1</sup>H-NMR spectrum of compound 3b.

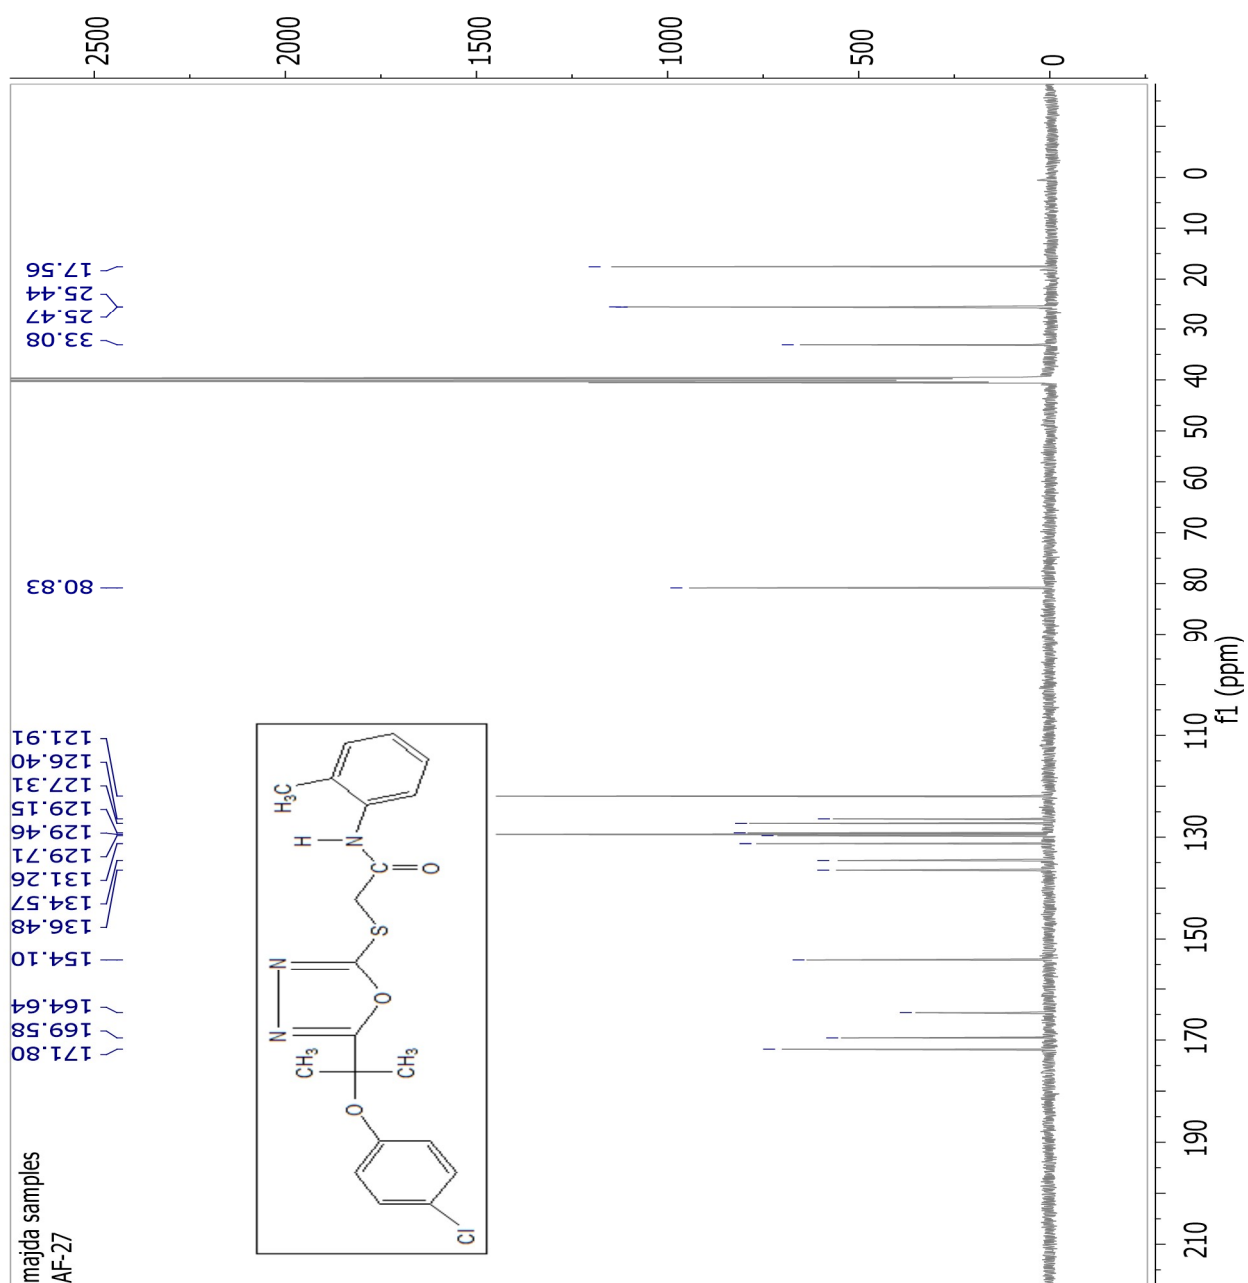Figure S5.  $^{13}\text{C}$ -NMR spectrum of compound 3b.

File: 41P  
Date Run: 06-20-2017 (Time Run: 10:11:39)  
Sample: MAJIDA BATOOL/INST. OF CHEM/UNIOF PUNJAB LAHORE  
Instrument: JEOL 600 MSRoute  
Inlet: Direct Probe  
Ionization mode: EI+

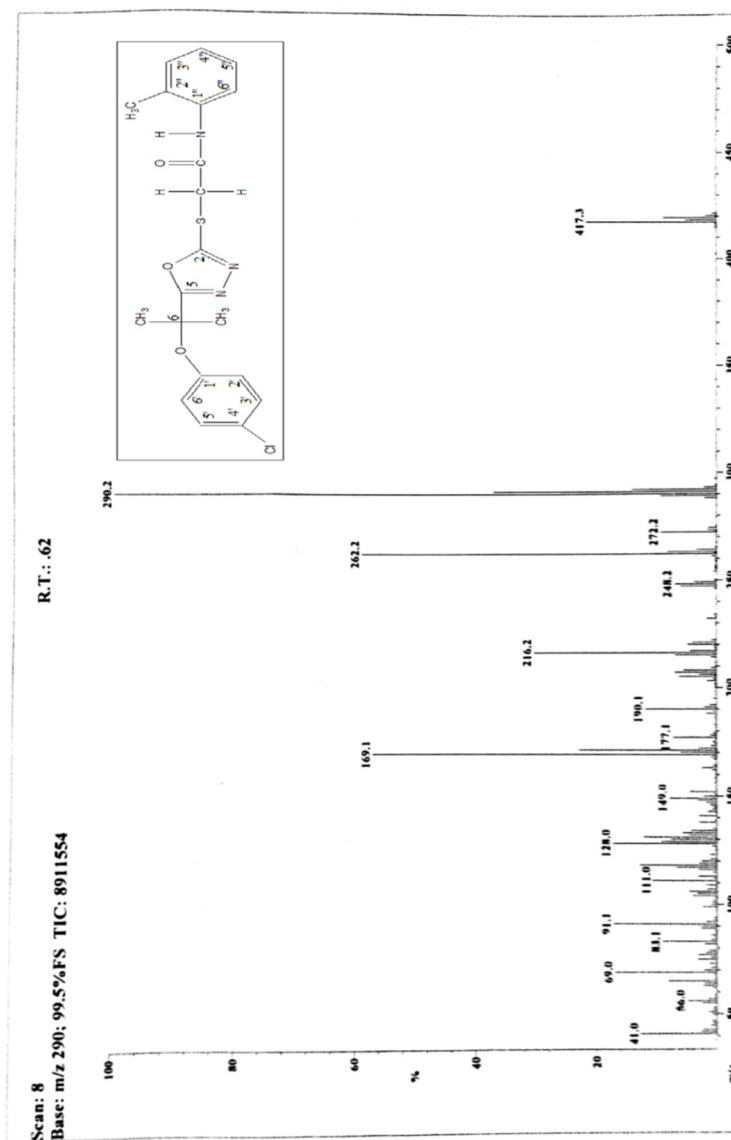

Figure S6. EI-MS of compound 3b.

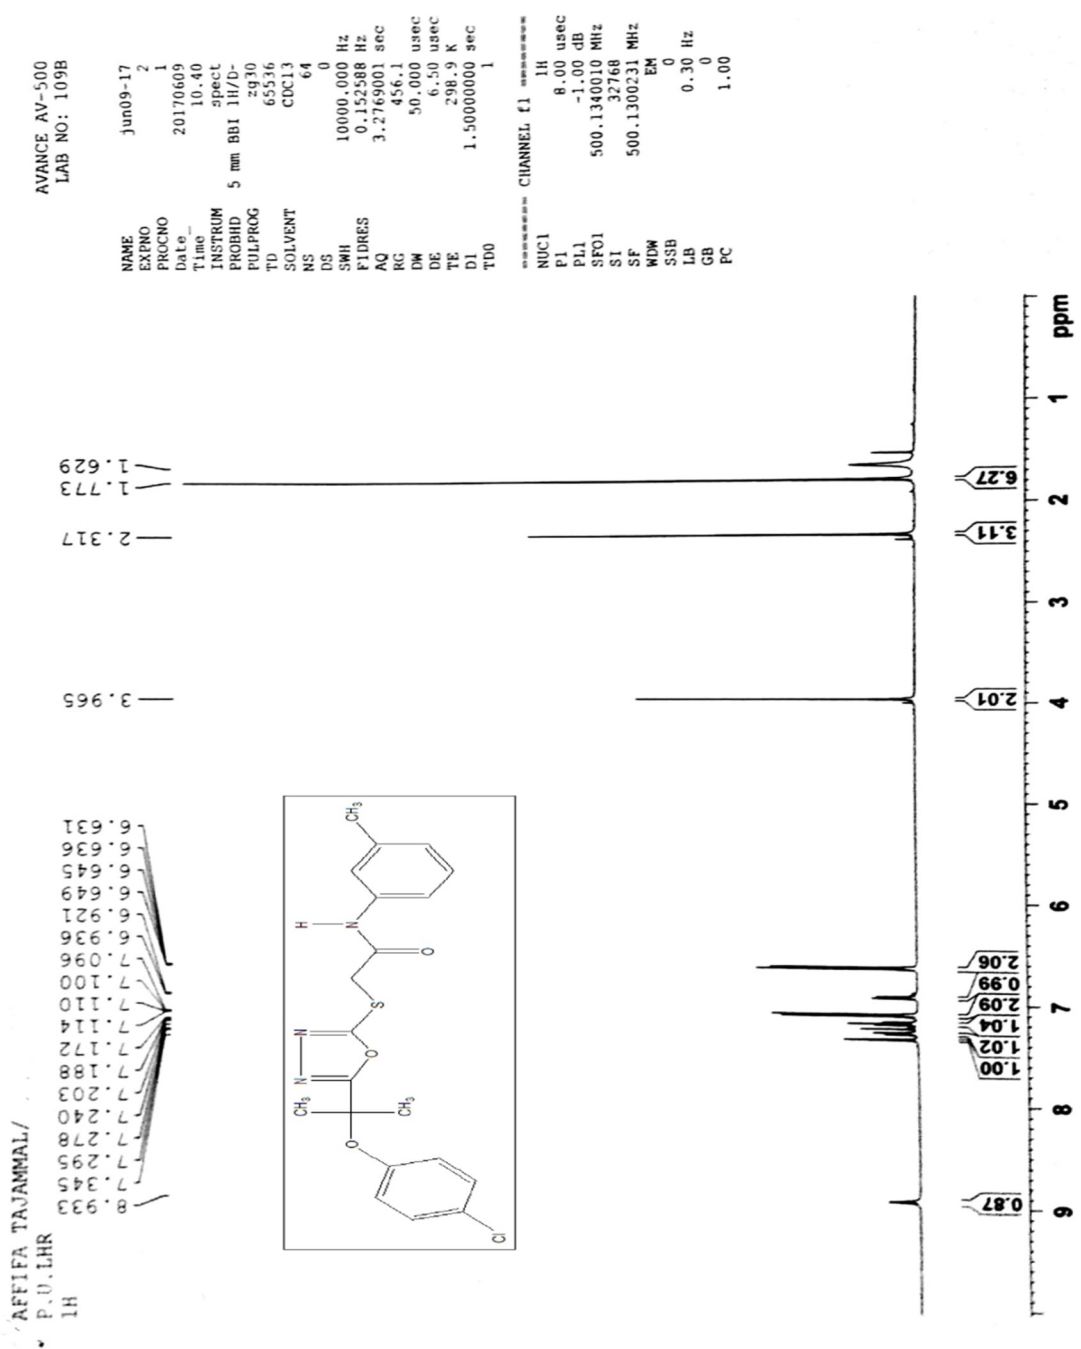

Figure S7. <sup>1</sup>H-NMR spectrum of compound 3c.



AFFIA /42P/CH:DEPT:U.O.PUNJAB/BB/

AVANCE 400  
LAB NO 117

```

NAME      June09-17
EXPNO    8
PROCNO   1
Date_    20170609
Time_    12.53
INSTRUM  spect
PROBHD   5 mm DUL 13C-1
PULPROG  zgpg
TD        32768
SOLVENT  DMSO
NS        18432
DS        2
SWH       24154.590 Hz
FIDRES   0.737140 Hz
AQ        0.6783476 sec
RG        18390.4
EW        20.700 usec
DE        6.50 usec
TE        300.0 K
D1        1.50000000 sec
D11       0.03000000 sec
TDO       18
===== CHANNEL f1 =====
NUC1      13C
P1        8.55 usec
PL1       7.00 dB
SFO1      100.6243395 MHz
===== CHANNEL f2 =====
CPDPRG2  waltz16
NUC2      1H
PCPD2     80.00 usec
PZ2       0.00 dB
PL2       19.00 dB
PL13      20.00 dB
SFO2      400.1324008 MHz
SI        16384
SF        100.6122911 MHz
WDM       EM
SSB       0
LB        1.00 Hz
GB        0
PC        1.00
    
```

169.888  
 166.177  
 165.017  
 152.843  
 139.042  
 137.431  
 129.412  
 128.873  
 125.607  
 122.983  
 120.455  
 116.986  
 77.213  
 76.988  
 76.679  
 75.550  
 36.233  
 29.899  
 29.081  
 21.437

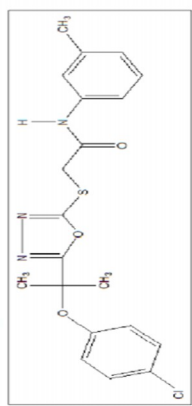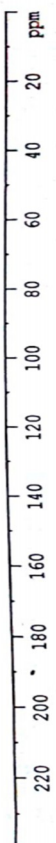

Figure S8. <sup>13</sup>C-NMR spectrum of compound 3c.

File: 42P Date Run: 06-20-2017 (Time Run: 08:53:33)  
 Sample: MAJIDA BATUOL/INST. OF CHEM/UNLOF PUNJAB LAHORE  
 Instrument: JEOL-600 MSRoute  
 Inlet: Direct Probe  
 Ionization mode: EI+

Scan: 10  
 Base: m/z 290; 99.5%FS TIC: 10286106

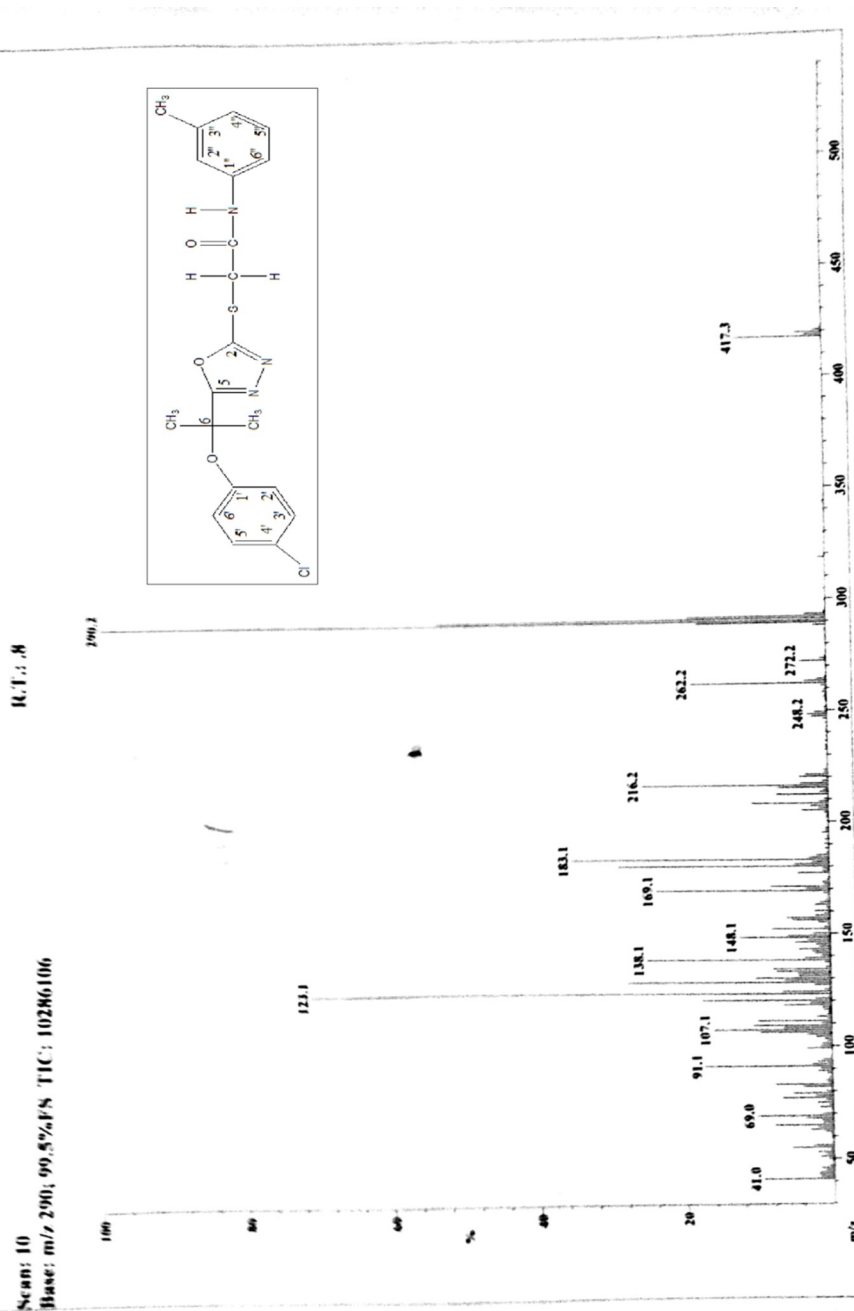

Figure S9. EI-MS of compound 3c.

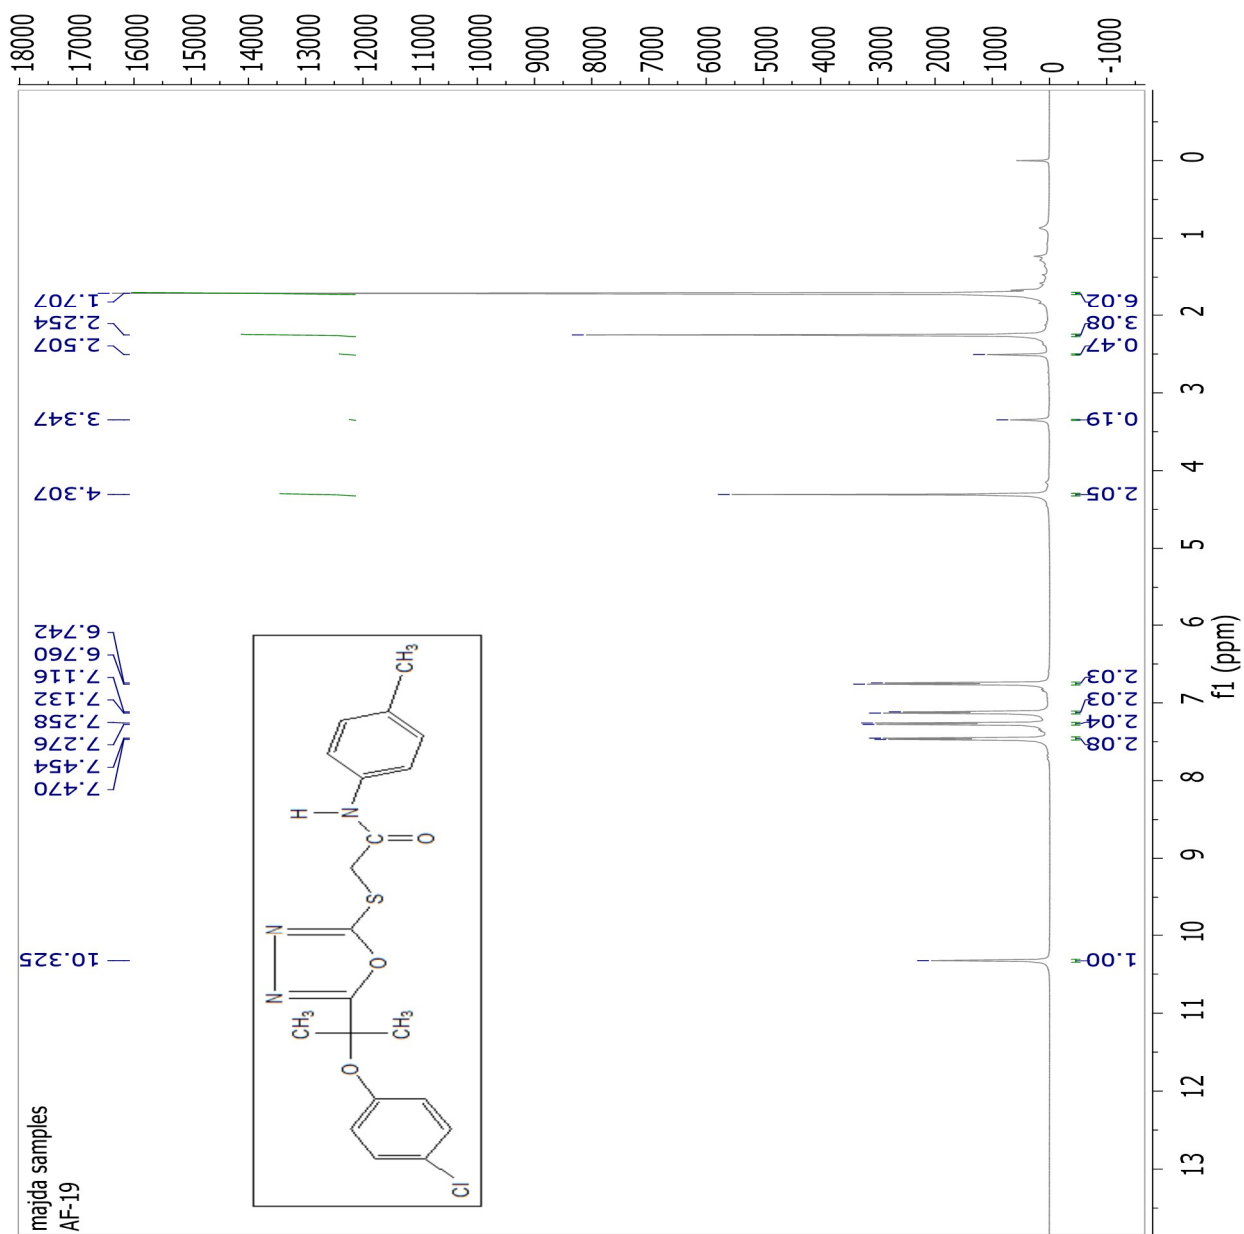

Figure S10. <sup>1</sup>H-NMR spectrum of compound 3d.

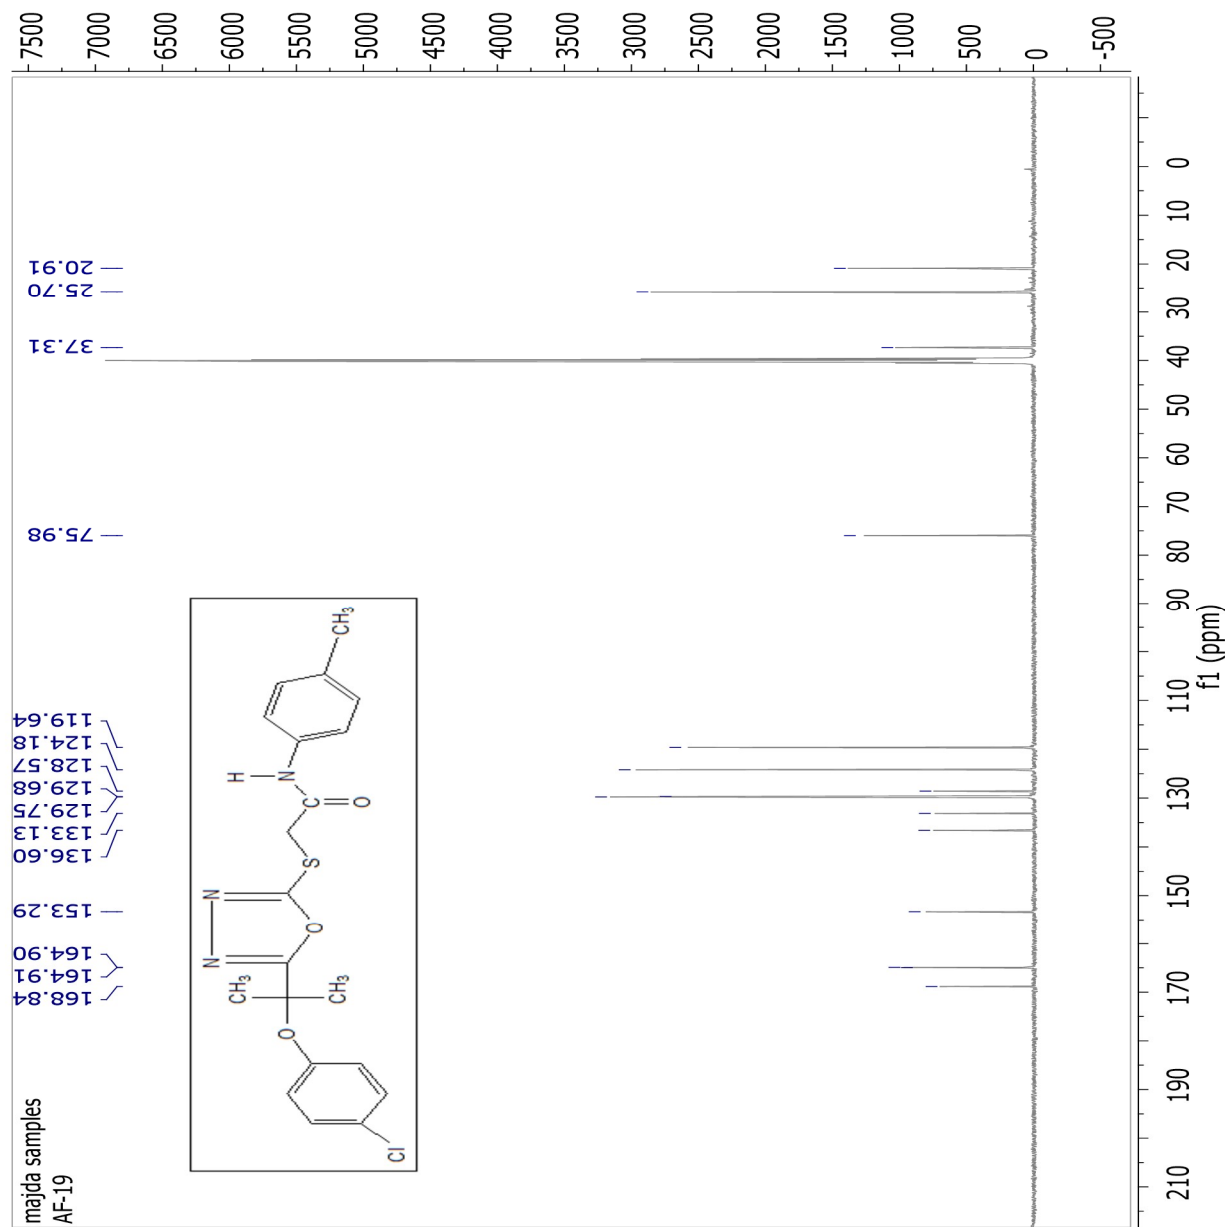

Figure S11. <sup>13</sup>C-NMR spectrums of compound 3d.

Mass Lab (104)  
6/19/2017 2:07:14 PM Page 1

File: 10P Date Run: 06-19-2017 (Time Run: 13:58:24)  
 Sample: MAJDA RATOOL/INST. OF CHEM/UNLOF PUNJAB LAHORE  
 Instrument: JEOL 600 MSRoute  
 Inlet: Direct Probe

Ionization mode: EI+

Scan: 12 Base: m/z 290; 99.5%FS TIC: 6957470

R.T.: .98

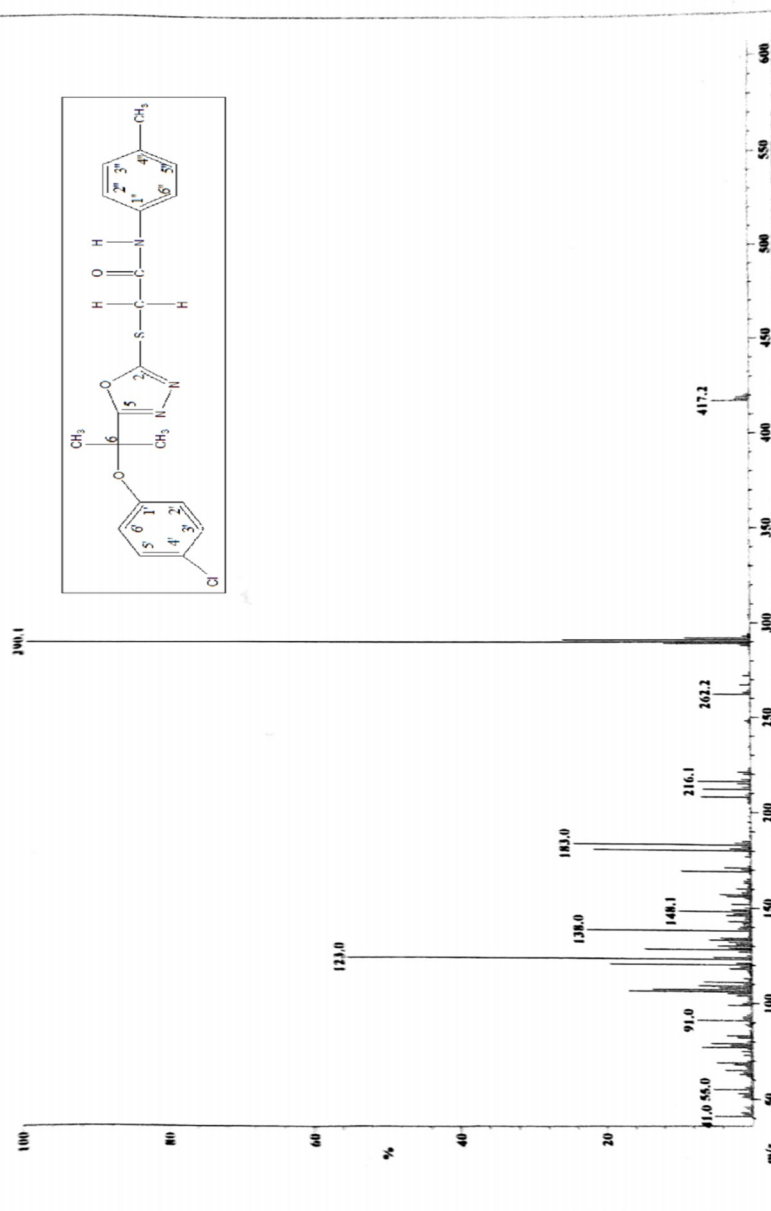

Figure S12. EI-MS of compound 3d.

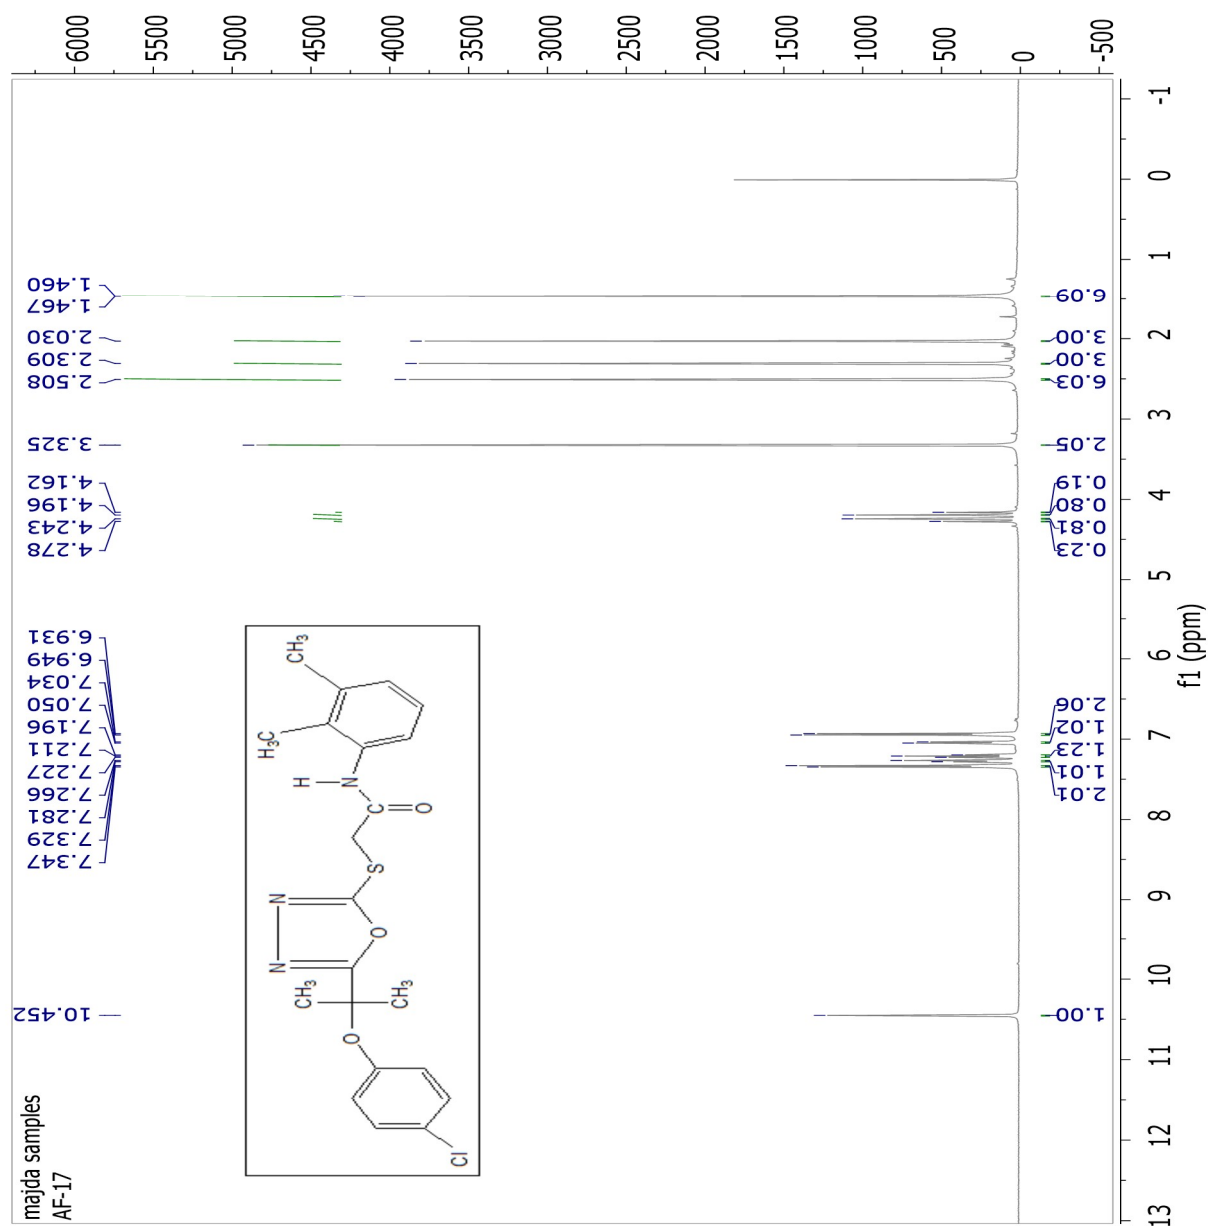

Figure S13. <sup>1</sup>H-NMR spectrum of compound 3e.

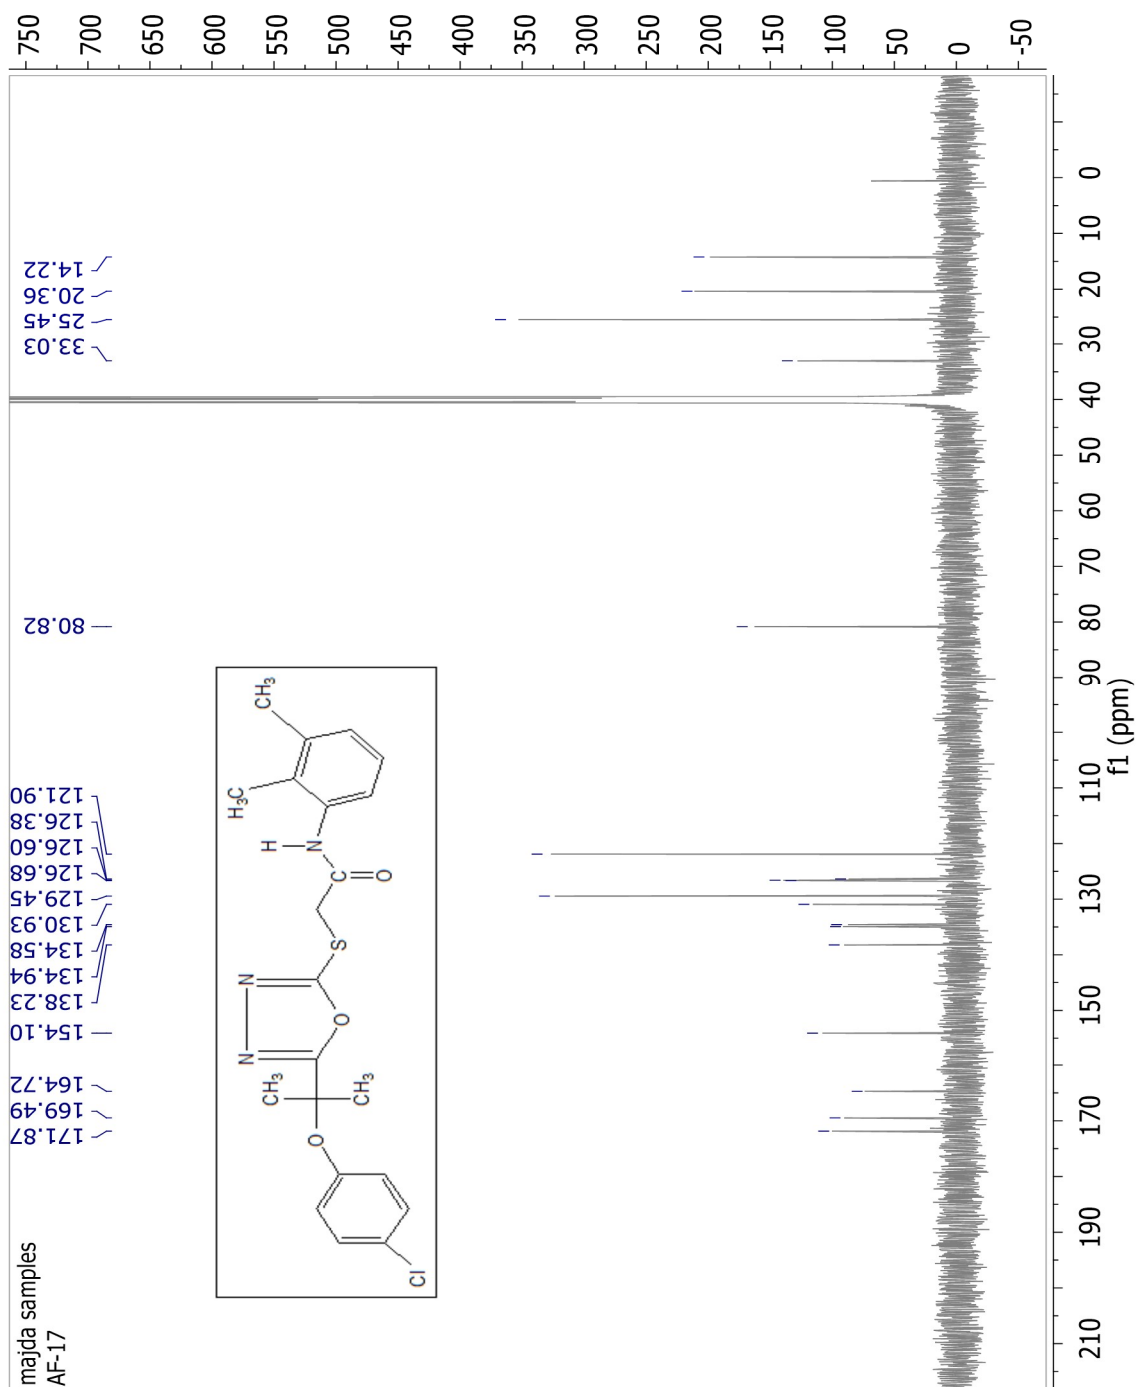

Figure S14. <sup>13</sup>C-NMR spectrum of compound 3e.

File: 2P Date Run: 06-20-2017 (Time Run: 09:13:10)  
 Sample: MAJDA BATOOL/INST. OF CHEM/UNLOF PUNJAB LAHORE  
 Instrument: JEOL 600 MSRoute  
 Inlet: Direct Probe Ionization mode: EI+

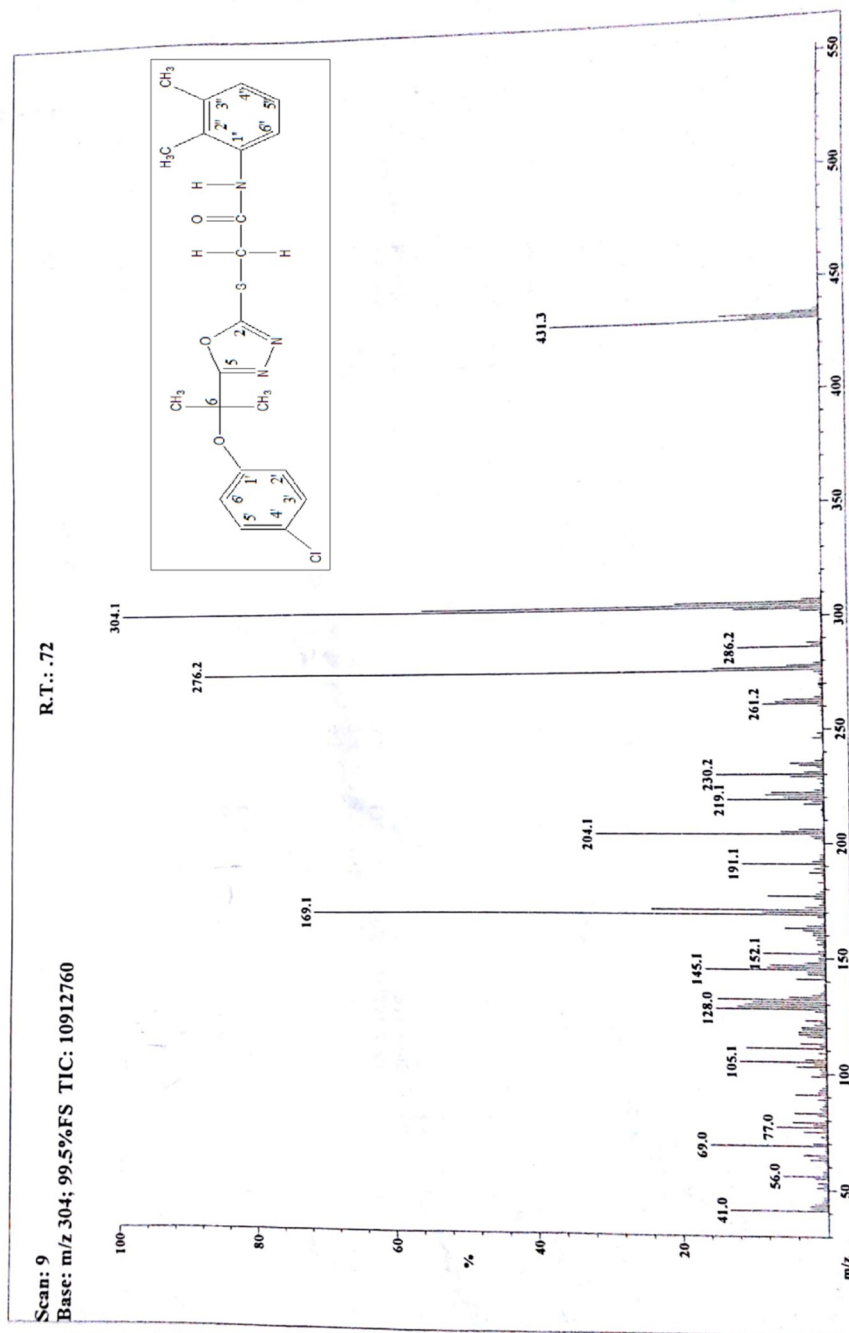

Figure S15. EI-MS of compound 3e.





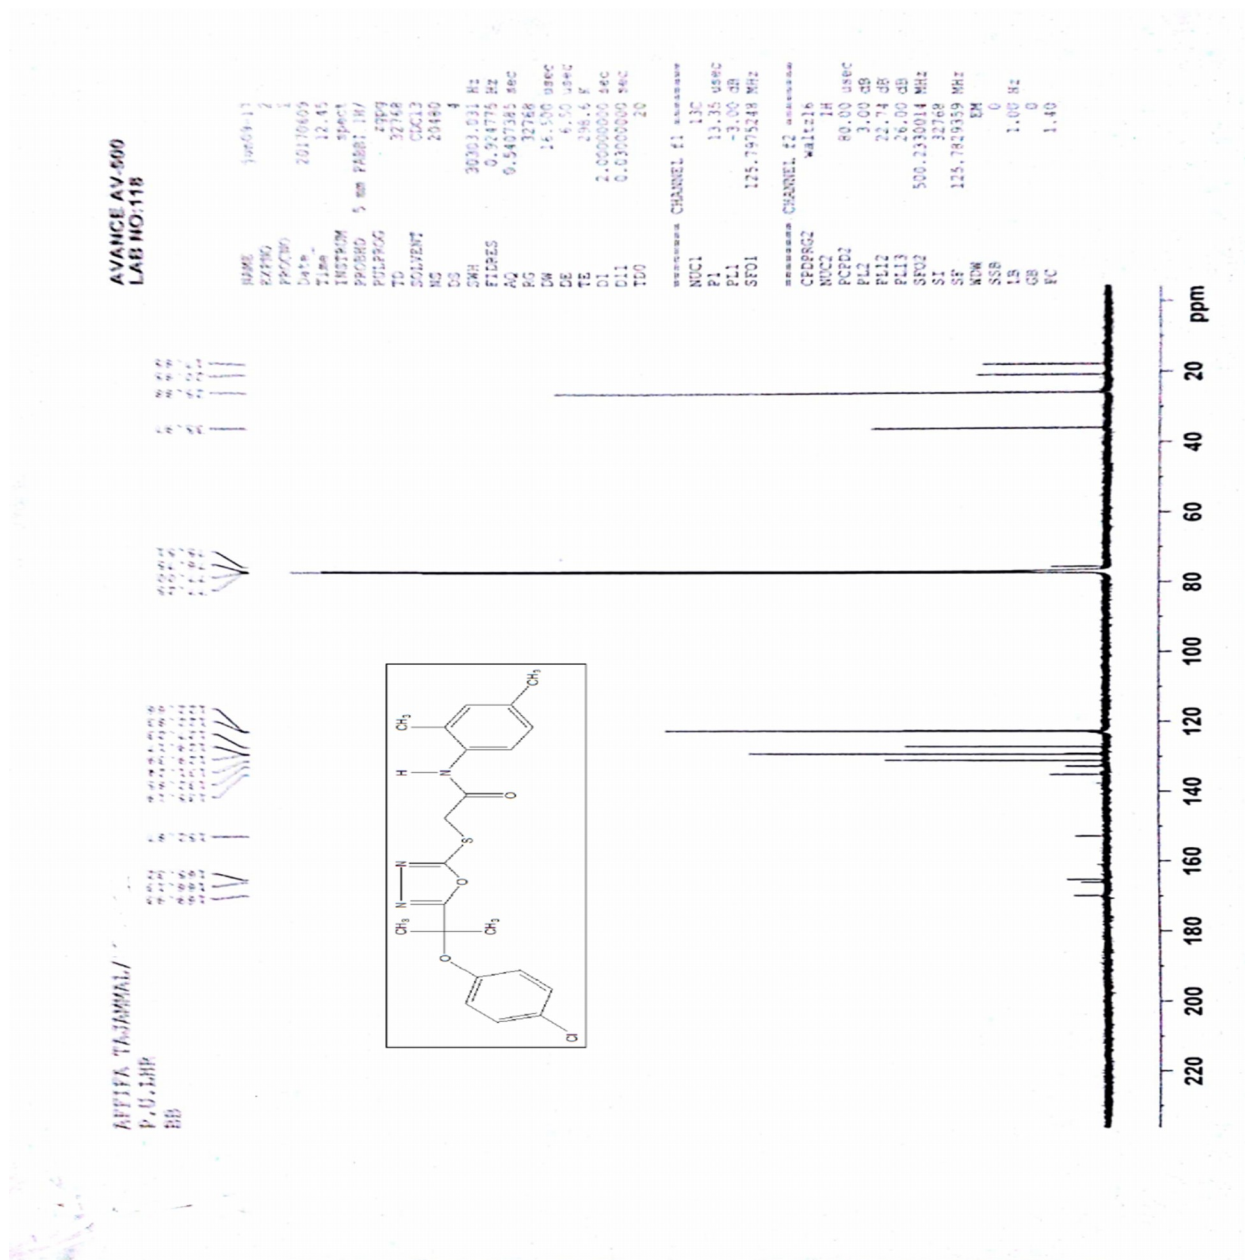

**Figure S17.** <sup>13</sup>C-NMR spectrum of compound 3f.

Mass Lab (104)  
6/19/2017 1:44:50 PM Page 1

File: IP  
Date Run: 06-19-2017 (Time Run: 13:36:16)  
Sample: MAJDA BATOOL/INST. OF CHEM /UNIOF PUNJAB LAHORE  
Instrument: JEOL 600 MSRoute  
Inlet: Direct Probe  
Ionization mode: EI+

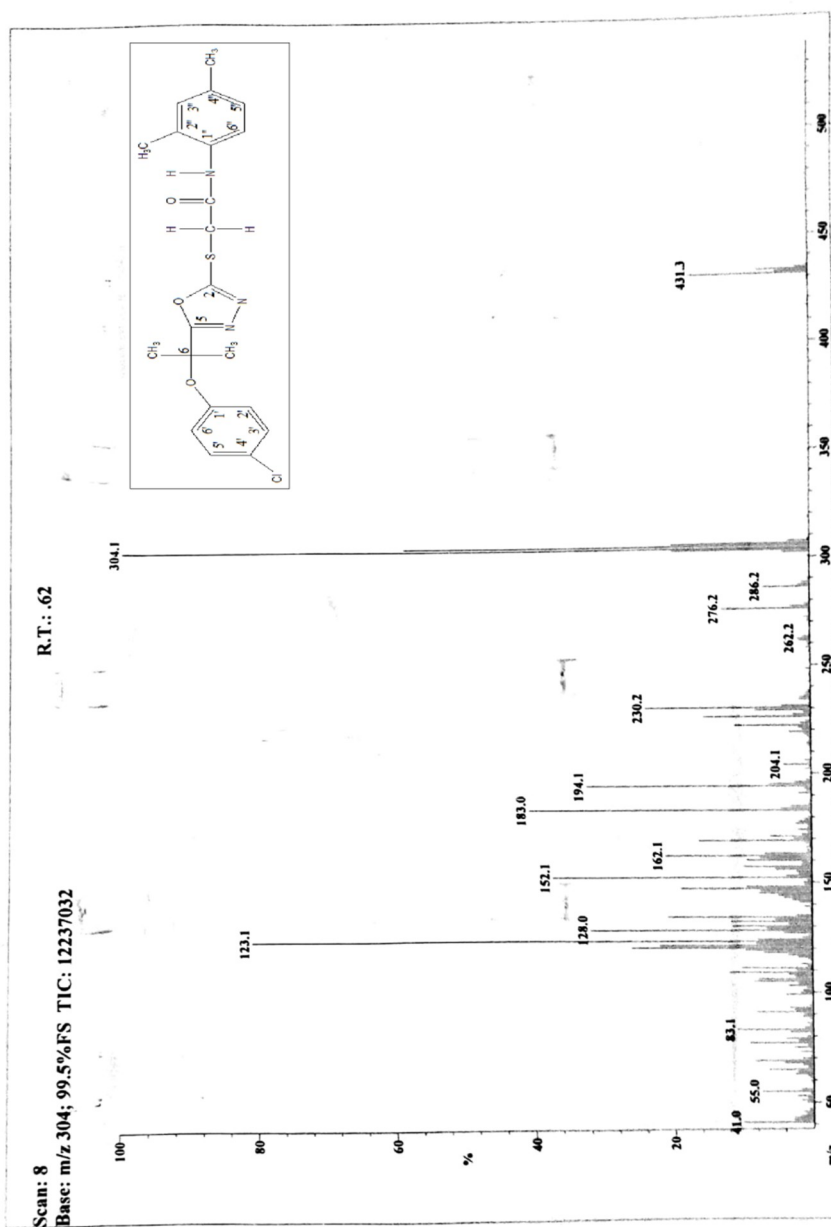

Figure S18. EI-MS of compound 3f.

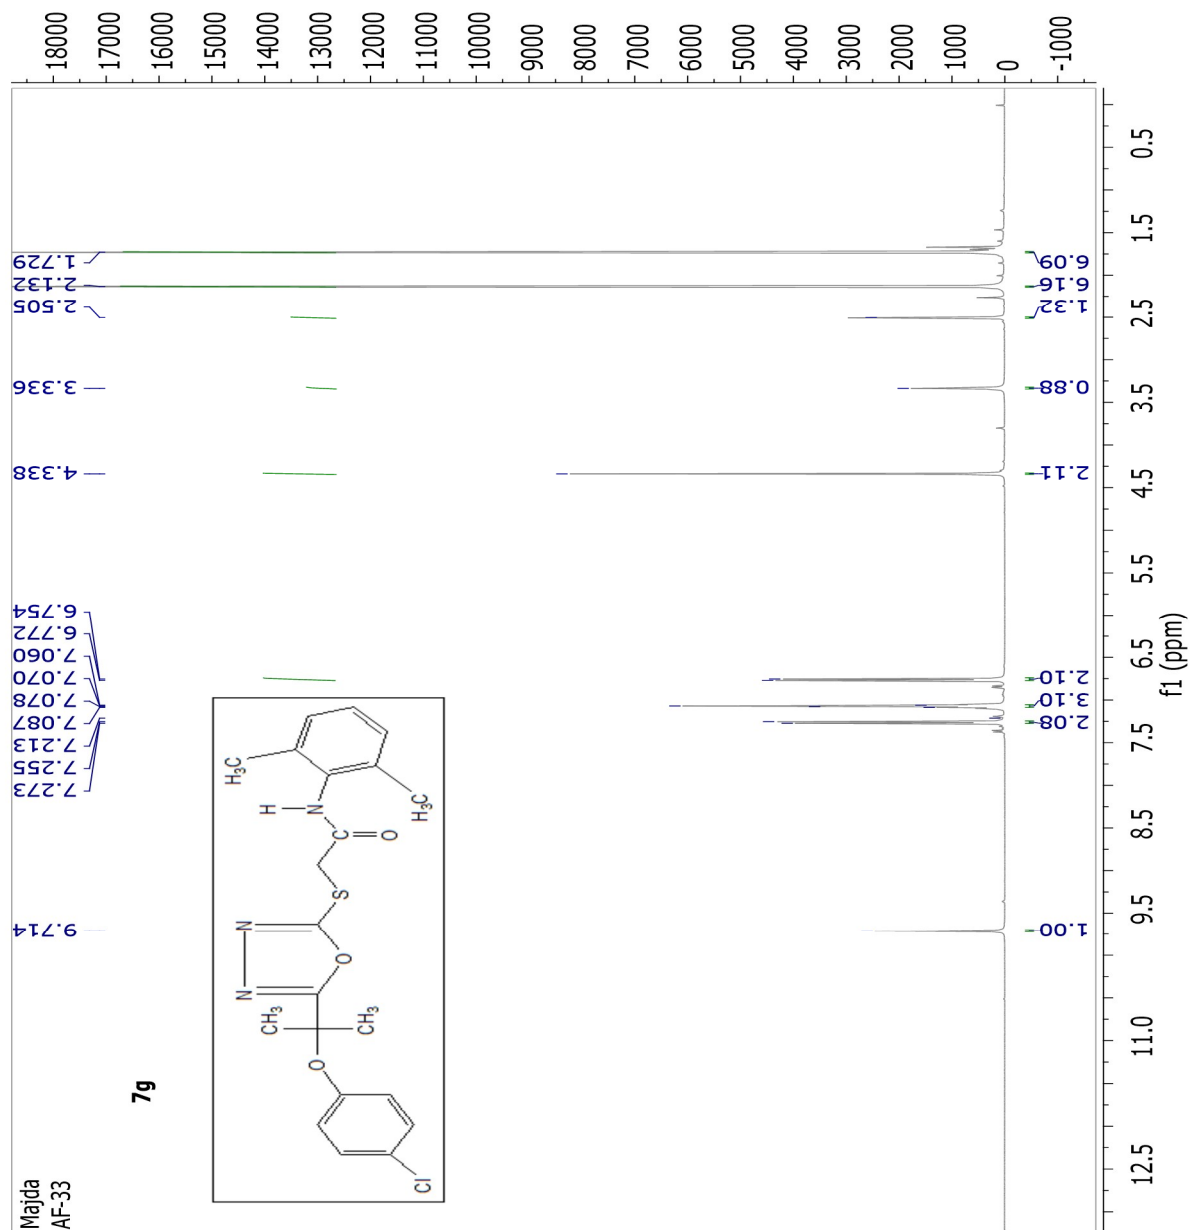

Figure S19. <sup>1</sup>H-NMR spectrum of compound 3g.

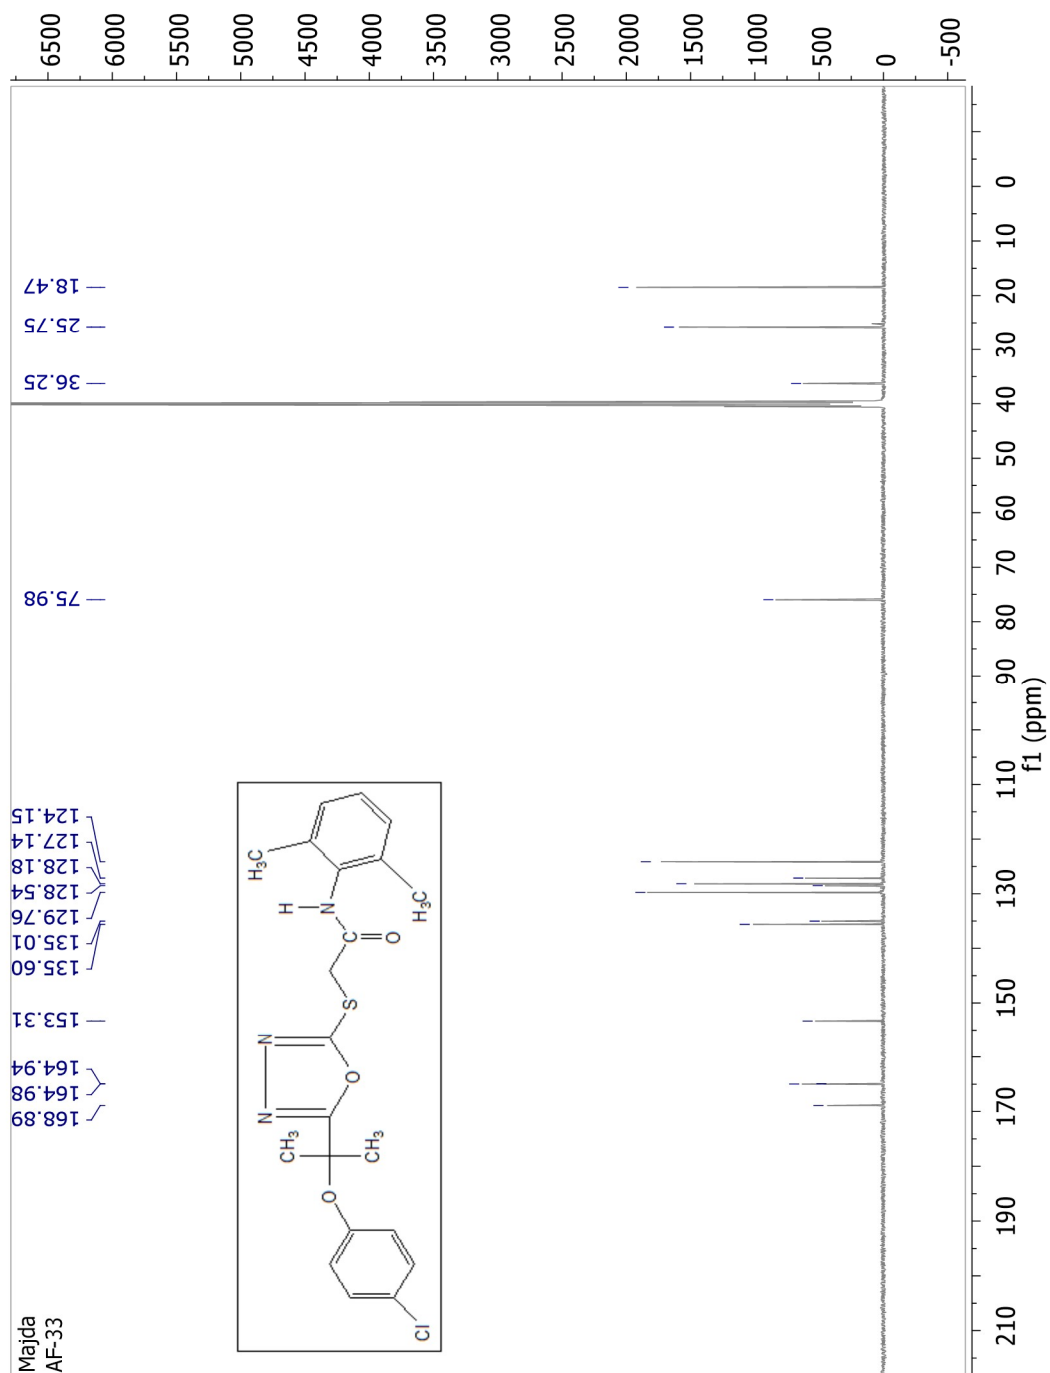

Figure S20. <sup>13</sup>C-NMR spectrum of compound 3g.

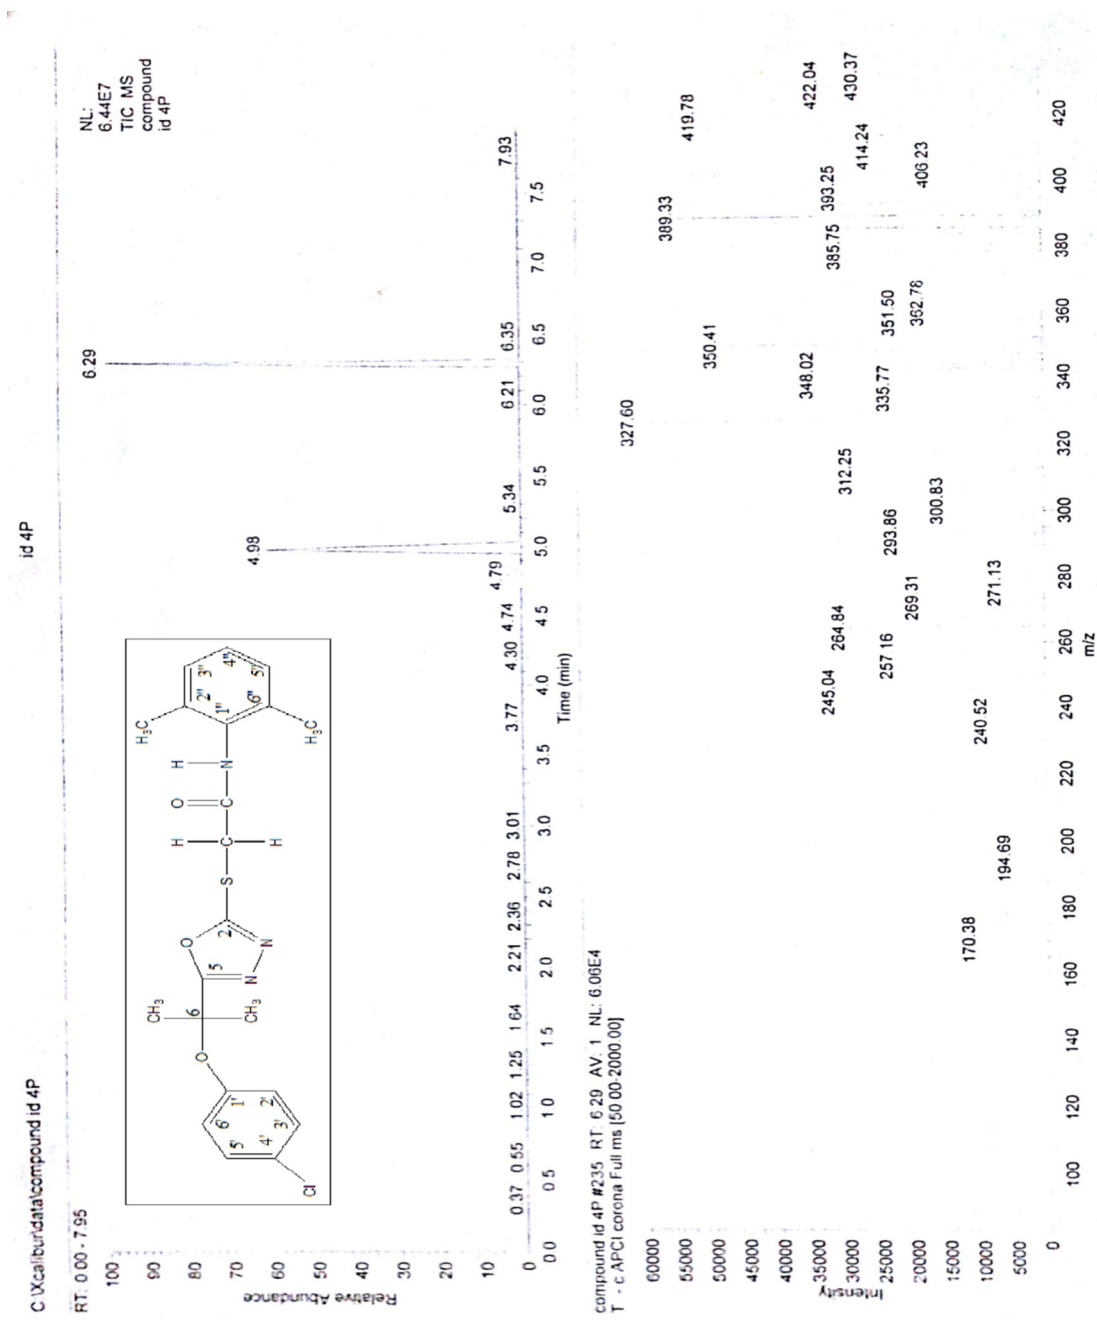

Figure S21. EI-MS of compound 3g.

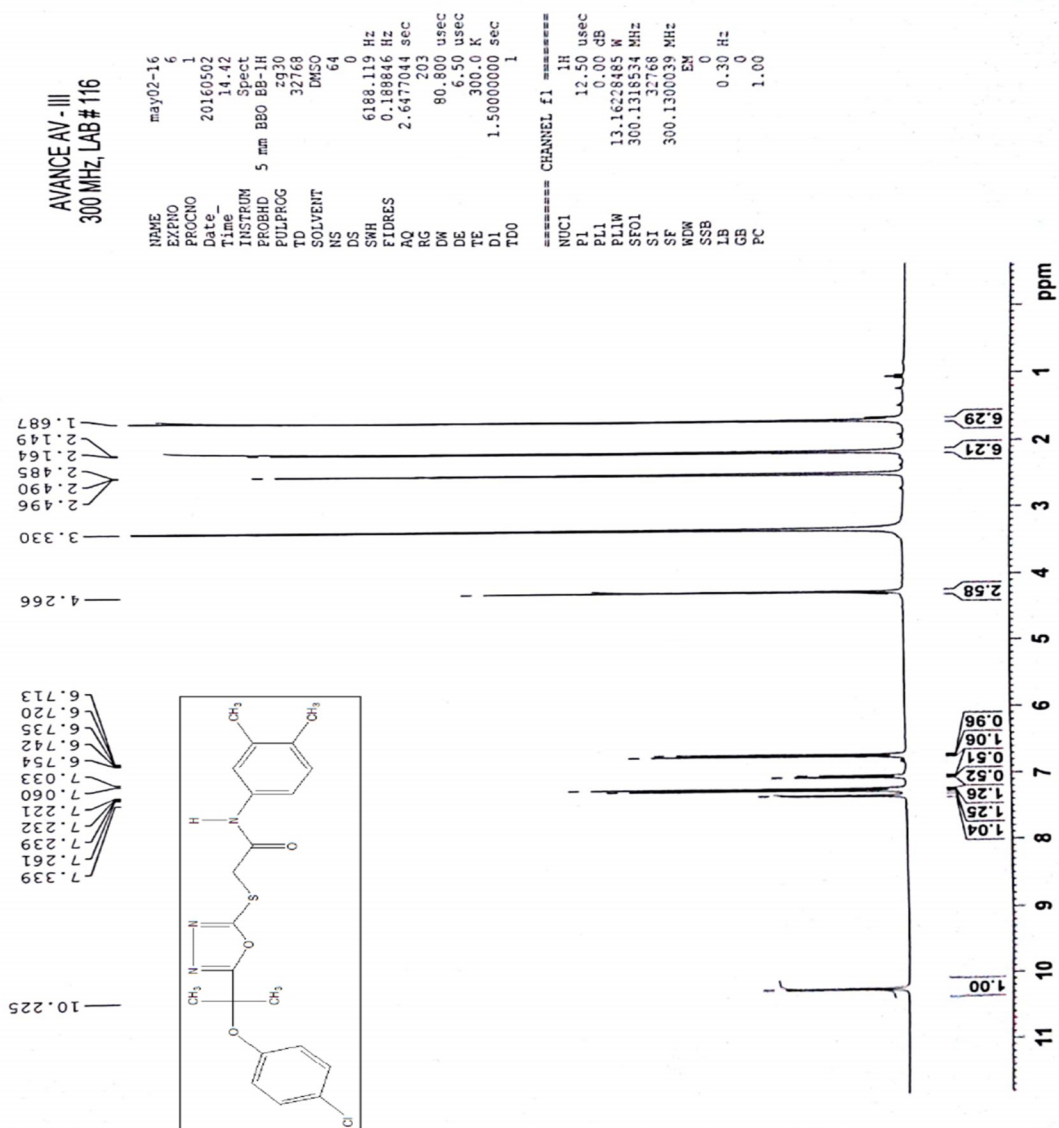

Figure S22. <sup>1</sup>H-NMR spectrum of compound 3h.

Affifa/Dr,Riffat  
 Ins:O.Ch:U.O. Punjab/  
 DEPT135

AVANCE AV - III  
 300 MHz, LAB # 116

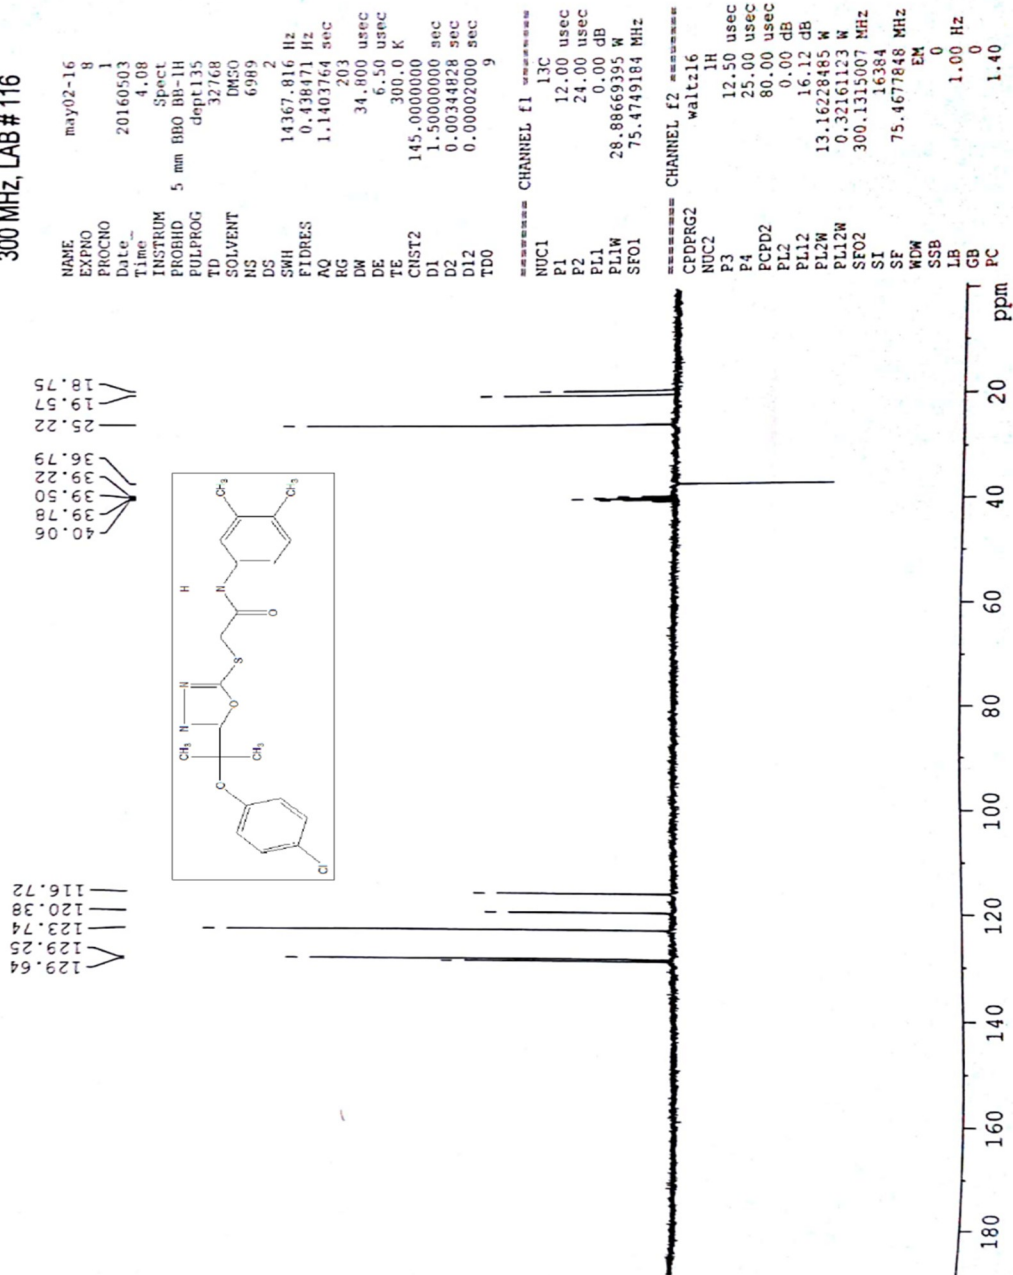

Figure S23. <sup>13</sup>C-NMR spectrum of compound 3h.



Mass Lab (104)  
6/20/2017 10:10:39 AM

Page 1

File: SP  
Sample: MAJDA BATOOL/INST. OF CHEM/UNL.OF PUNJAB LAHORE  
Instrument: JEOL 600 MSRoute  
Inlet: Direct Probe

Date Run: 06-20-2017 (Time Run: 10:02:00)

Ionization mode: EI+

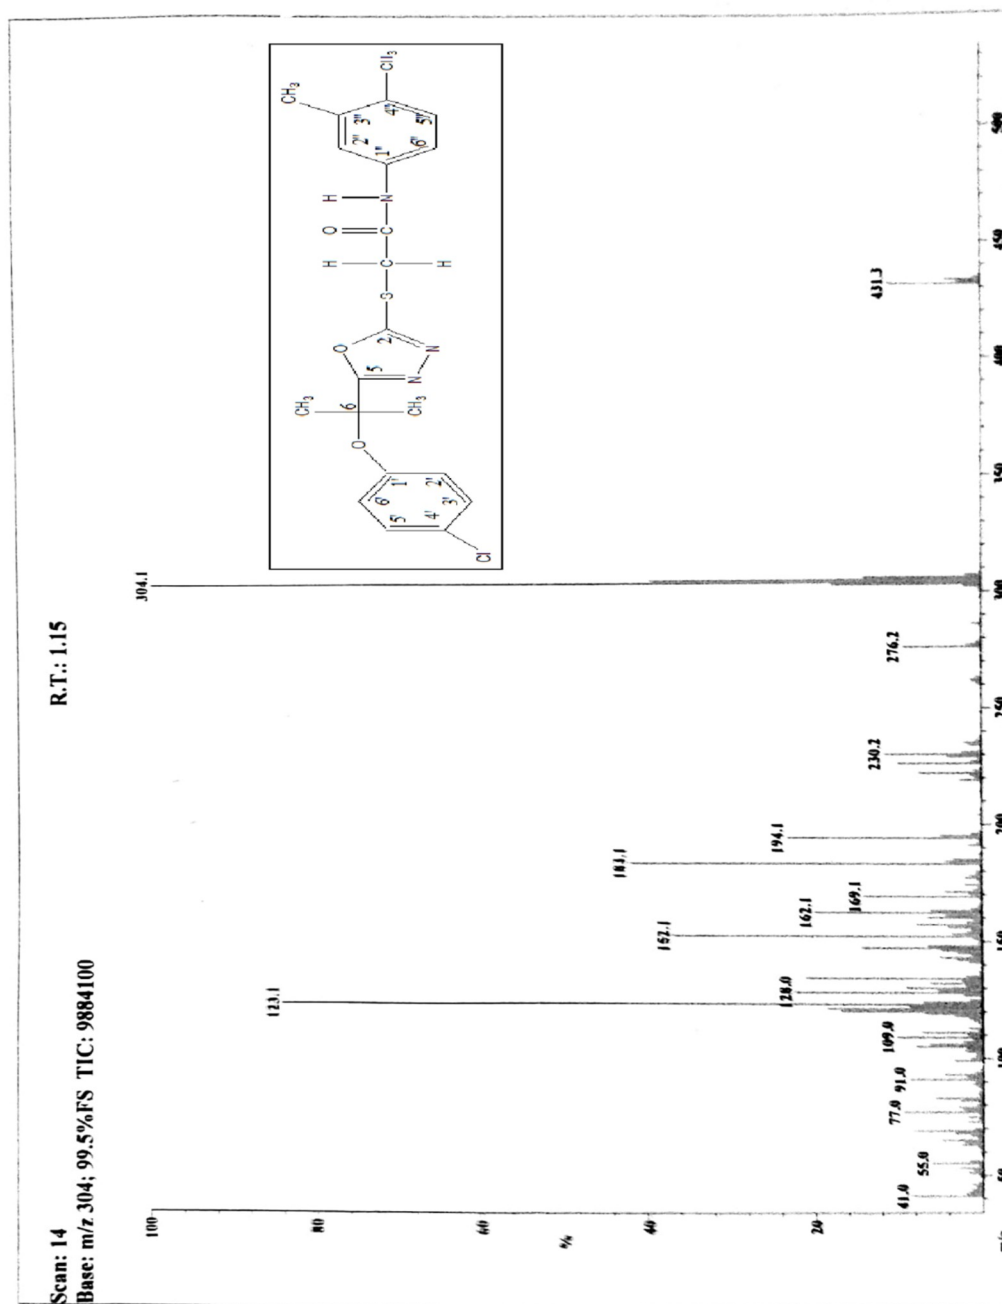

Figure S24. EI-MS of compound 3h.

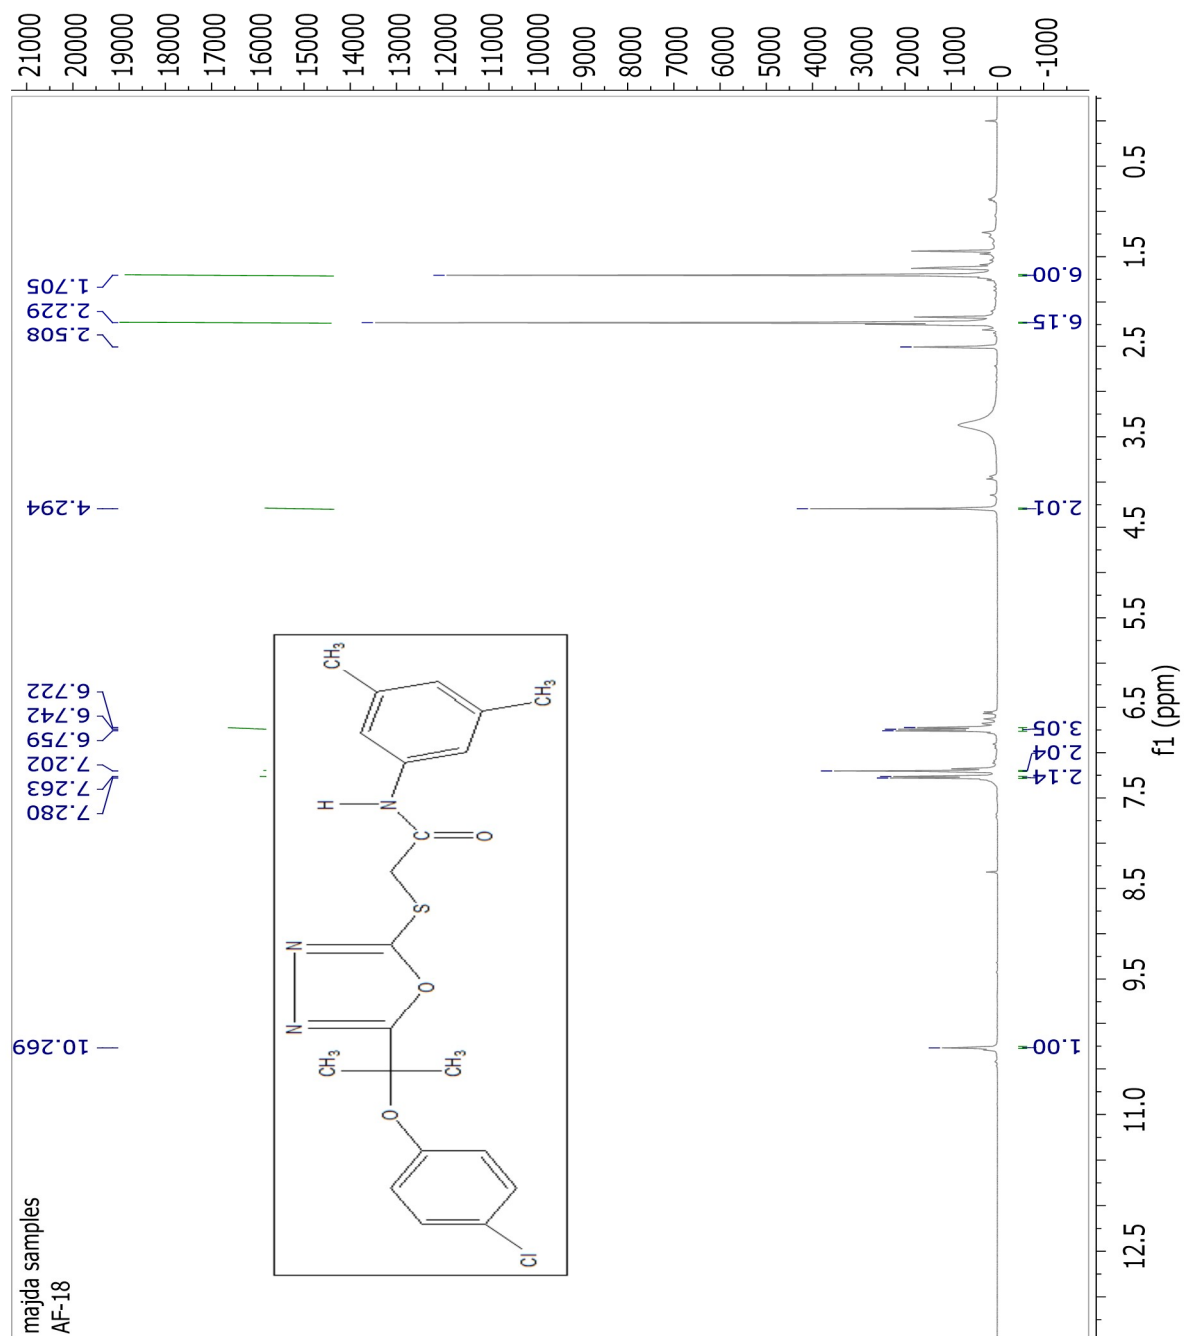

Figure S25. <sup>1</sup>H-NMR spectrum of compound 3i.

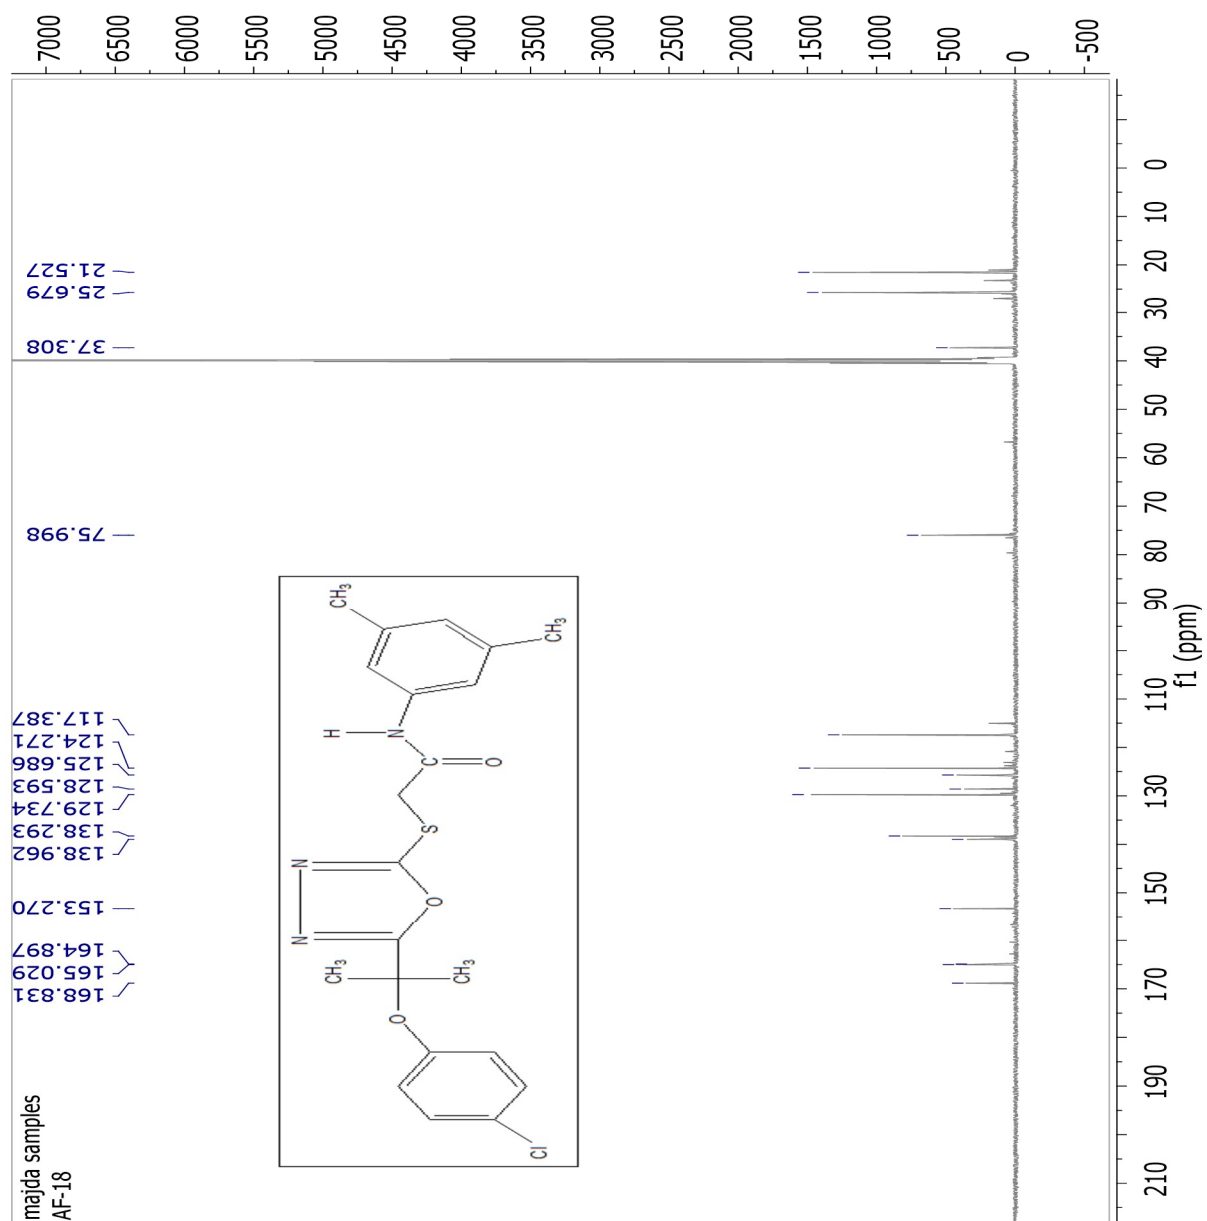

Figure S26.  $^{13}\text{C}$ -NMR spectrum of compound 3i.

Mass Lab (104)  
6/20/2017 10:42:11 AM Page 1

File: 61P Date Run: 06-20-2017 (Time Run: 10:36:17)  
Sample: MAJIDA BATOOL/INST. OF CHEM/UNLOF PUNJAB LAHORE  
Instrument: JEOL 600 MSRoute  
Inlet: Direct Probe Ionization mode: EI+

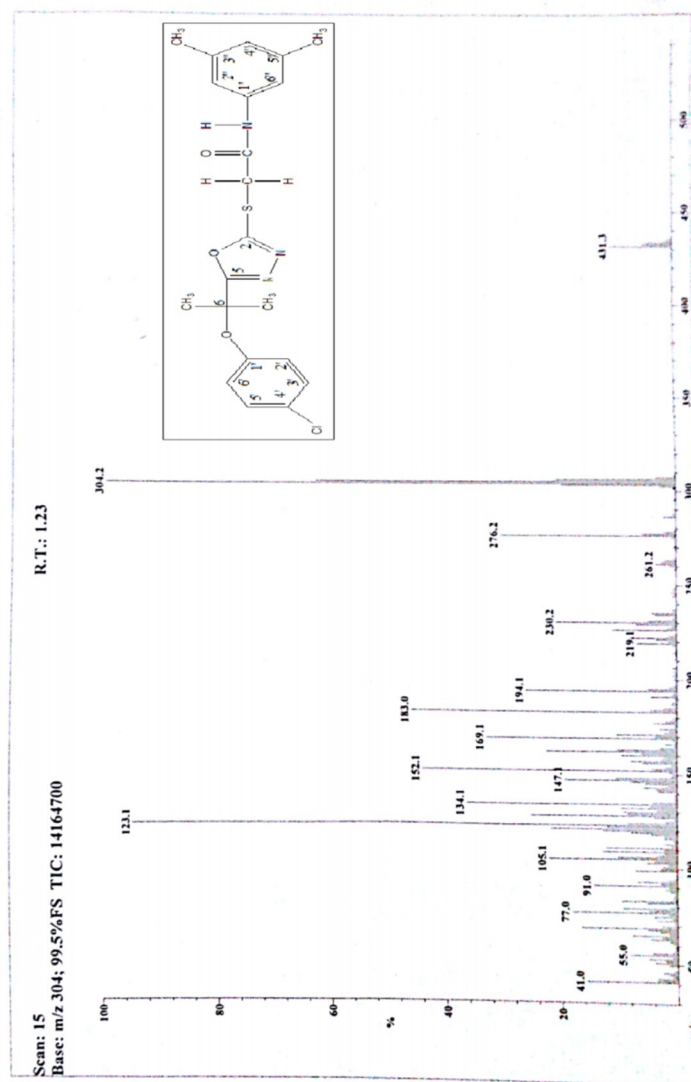

Figure S27. EI-MS of compound 3i.

Table S1. Docking results for the highest ranked biologically active ligand F-Xa.

| Compd. No. | Score | <i>In-vivo</i> anticoagulant activity at 7 <sup>th</sup> h (Sec) | ACE Kcal/mole | Amino acids showing hydrogen bond contacts                  | Distance (Å)     | Amino acids showing van der Waals contacts lie within 4 Å                                                                                                                                                                        | Amino acids showing hydrophobic contacts lie within 4 Å                                                                                                          | Amino acids showing arene-cation contacts |
|------------|-------|------------------------------------------------------------------|---------------|-------------------------------------------------------------|------------------|----------------------------------------------------------------------------------------------------------------------------------------------------------------------------------------------------------------------------------|------------------------------------------------------------------------------------------------------------------------------------------------------------------|-------------------------------------------|
| 1          | 3562  | 74                                                               | -197.87       | Glu <sup>49</sup>                                           | 3.22             | Ser <sup>48</sup> , Leu <sup>47</sup> , Met <sup>242</sup> , Ala <sup>24</sup> , Cys <sup>122</sup> , Pro <sup>43</sup> , Tyr <sup>42</sup>                                                                                      | Pro <sup>120</sup> , Phe <sup>114</sup> , Cys <sup>44</sup> , Arg <sup>25</sup> , Leu <sup>123</sup>                                                             | Arg <sup>25</sup>                         |
| 3a         | 6270  | 342                                                              | -352.28       | Arg <sup>25</sup>                                           | 2.94             | Tyr <sup>42</sup> , Met <sup>242</sup> , Phe <sup>114</sup> , Cys <sup>122</sup> , Leu <sup>47</sup> , Ser <sup>48</sup> , Pro <sup>120</sup> , Gly <sup>26</sup> , Gly <sup>40</sup> , Thr <sup>39</sup>                        | Ala <sup>24</sup> , Pro <sup>43</sup>                                                                                                                            | -                                         |
| 3b         | 5312  | 108                                                              | -370.05       | -                                                           | -                | Leu <sup>47</sup> , SER <sup>48</sup> , Pro <sup>120</sup> , Tyr <sup>42</sup> , Phe <sup>114</sup> , Pro <sup>41</sup> , Gly <sup>40</sup> , Pro <sup>124</sup> , Glu <sup>124</sup>                                            | Cys <sup>44</sup> , Pro <sup>43</sup> , Gly <sup>26</sup> , Pro <sup>124</sup> , Met <sup>242</sup> , Phe <sup>11</sup> , Ala <sup>24</sup> , Leu <sup>123</sup> | Arg <sup>25</sup>                         |
| 3c         | 5324  | 95                                                               | -253.57       | Arg <sup>25</sup>                                           | 2.83             | Arg <sup>125</sup> , Glu <sup>124</sup> , Pro <sup>124</sup> , Ala <sup>24</sup> , Cys <sup>122</sup> , Phe <sup>114</sup> , Glu <sup>49</sup> , Ser <sup>48</sup> , Leu <sup>47</sup> , Met <sup>242</sup> , Asp <sup>239</sup> | Leu <sup>123</sup> , Arg <sup>25</sup> , Pro <sup>120</sup> , Leu <sup>235</sup> , Lys <sup>236</sup>                                                            | -                                         |
| 3d         | 5646  | 132                                                              | -287.52       | Arg <sup>25</sup> , Leu <sup>123</sup>                      | 3.19, 3.25       | -                                                                                                                                                                                                                                | Cys <sup>44</sup> , Pro <sup>120</sup> , Arg <sup>25</sup> , Leu <sup>235</sup> , Lys <sup>236</sup>                                                             | -                                         |
| 3e         | 5658  | 167                                                              | -189.68       | Arg <sup>25</sup> , Leu <sup>123</sup> , Pro <sup>124</sup> | 2.98, 3.03, 3.17 | Arg <sup>125</sup> , Glu <sup>124</sup> , Phe <sup>114</sup> , Glu <sup>44</sup> , Ser <sup>48</sup>                                                                                                                             | Lys <sup>236</sup> , Ala <sup>24</sup> , Arg <sup>25</sup> , Leu <sup>123</sup> , Cys <sup>44</sup>                                                              | -                                         |
| 3f         | 5626  | 84                                                               | -340.54       | Arg <sup>25</sup> , Arg <sup>25</sup>                       | 2.99, 2.74       | Ala <sup>24</sup> , Gly <sup>26</sup> , Phe <sup>114</sup> , Gly <sup>40</sup> , Pro <sup>43</sup> , Tyr <sup>42</sup> , Leu <sup>47</sup> , Met <sup>242</sup> , Glu <sup>124</sup>                                             | Phe <sup>11</sup> , Leu <sup>123</sup> , Leu <sup>235</sup> , Cys <sup>44</sup> , Pro <sup>41</sup> , Pro <sup>120</sup>                                         | -                                         |
| 3g         | 5442  | 92                                                               | -262.48       | -                                                           | -                | Asp <sup>239</sup> , Pro <sup>124</sup> , Glu <sup>124</sup> , Trp <sup>127</sup> , Cys <sup>122</sup>                                                                                                                           | Ala <sup>24</sup> , Phe <sup>11</sup> , Cys <sup>44</sup> , Arg <sup>25</sup> , Lys <sup>236</sup> , Arg <sup>125</sup> , Leu <sup>235</sup>                     | -                                         |
| 3h         | 5612  | 130                                                              | -311.48       | -                                                           | -                | Thr <sup>39</sup> , Gly <sup>40</sup> , Pro <sup>41</sup> , Gly <sup>26</sup> , Pro <sup>120</sup> , Cys <sup>44</sup> , Leu <sup>47</sup> , Asp <sup>239</sup> , Ala <sup>24</sup> , Phe <sup>11</sup> , Glu <sup>124</sup>     | Pro <sup>43</sup> , Leu <sup>123</sup> , Phe <sup>114</sup>                                                                                                      | Arg <sup>25</sup>                         |

|                  |      |     |         |   |   |                                                                                                                                                                                                                                                             |                                                                |                   |
|------------------|------|-----|---------|---|---|-------------------------------------------------------------------------------------------------------------------------------------------------------------------------------------------------------------------------------------------------------------|----------------------------------------------------------------|-------------------|
| <b>3i</b>        | 5662 | 214 | -312.12 | - | - | Pro <sup>41</sup> , Tyr <sup>42</sup> , Pro <sup>120</sup> ,<br>Leu <sup>47</sup> , Cys <sup>44</sup> , Met <sup>242</sup> ,<br>Ala <sup>24</sup> , Asp <sup>239</sup> , Gly <sup>26</sup> ,<br>Pro <sup>43</sup> , Thr <sup>39</sup> , Gly <sup>40</sup>   | Arg <sup>25</sup>                                              | Arg <sup>25</sup> |
| <b>RPR200095</b> | 5192 | 110 | -197.81 | - | - | Leu <sup>47</sup> , Ser <sup>48</sup> , Cys <sup>23</sup> , Tyr <sup>51</sup> ,<br>Cys <sup>122</sup> , Gly <sup>26</sup> , Ala <sup>24</sup> ,<br>Phe <sup>11</sup> , Pro <sup>124</sup> , Leu <sup>235</sup> ,<br>Asp <sup>239</sup> , Leu <sup>235</sup> | Lys <sup>243</sup> , Arg <sup>25</sup> ,<br>Met <sup>242</sup> | -                 |

No. = Specific code assigned to ligand; ACE= Atomic contact energy calculated by *Patch Dock* (kcal/mol); Distance = hydrogen bond length calculated from docked pose by using *Ligand interaction* tool of *Patch Dock*.

**Table S2.** DFT computed molecular properties (all in eV, except dipole moment which is in the units of Debye) for oxadiazoles derivatives obtained at B3LYP/6-31G\*\* level of theory.

| Sr. No. | Compound name | E <sub>HOMO</sub> | E <sub>LUMO</sub> | E <sub>gap</sub> | Ionisation potential (I) | Electron affinity (A) | Chemical hardness ( $\eta$ ) | Chemical softness (S) | Chemical potential ( $\mu$ ) | Electronegativity ( $\chi$ ) | Electrophilicity ( $\omega$ ) | Dipole moment (D) |
|---------|---------------|-------------------|-------------------|------------------|--------------------------|-----------------------|------------------------------|-----------------------|------------------------------|------------------------------|-------------------------------|-------------------|
| 1       | <b>1</b>      | -6.60             | -0.58             | 6.02             | 6.60                     | 0.58                  | 3.01                         | 0.17                  | -3.59                        | 3.59                         | 2.14                          | 3.66              |
| 2       | <b>3a</b>     | -6.25             | -0.64             | 5.61             | 6.25                     | 0.64                  | 2.80                         | 0.18                  | -3.44                        | 3.44                         | 2.12                          | 1.84              |
| 3       | <b>3b</b>     | -6.14             | -0.64             | 5.51             | 6.14                     | 0.64                  | 2.75                         | 0.18                  | -3.39                        | 3.39                         | 2.09                          | 1.83              |
| 4       | <b>3c</b>     | -6.15             | -0.60             | 5.54             | 6.15                     | 0.60                  | 2.77                         | 0.18                  | -3.37                        | 3.37                         | 2.06                          | 2.20              |
| 5       | <b>3d</b>     | -6.05             | -0.57             | 5.48             | 6.05                     | 0.57                  | 2.74                         | 0.18                  | -3.31                        | 3.31                         | 1.99                          | 2.39              |
| 6       | <b>3e</b>     | -6.07             | -0.58             | 5.49             | 6.07                     | 0.58                  | 2.75                         | 0.18                  | -3.32                        | 3.32                         | 2.01                          | 2.19              |
| 7       | <b>3f</b>     | -5.95             | -0.57             | 5.39             | 5.95                     | 0.57                  | 2.69                         | 0.19                  | -3.26                        | 3.26                         | 1.97                          | 2.36              |
| 8       | <b>3g</b>     | -6.41             | -0.54             | 5.87             | 6.41                     | 0.54                  | 2.94                         | 0.17                  | -3.47                        | 3.47                         | 2.05                          | 2.14              |
| 9       | <b>3h</b>     | -5.97             | -0.53             | 5.43             | 5.97                     | 0.53                  | 2.72                         | 0.18                  | -3.25                        | 3.25                         | 1.94                          | 2.67              |
| 10      | <b>3i</b>     | -6.08             | -0.54             | 5.54             | 6.08                     | 0.54                  | 2.77                         | 0.18                  | -3.31                        | 3.31                         | 1.98                          | 2.37              |

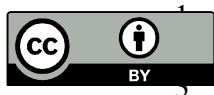

© 2018 by the authors. Submitted for possible open access publication under the terms and conditions of the Creative Commons Attribution (CC BY) license (<http://creativecommons.org/licenses/by/4.0/>).
